1 **Title:** Pollinator size and its consequences: Predictive allometry for pollinating insects

2 **Running title:** Allometric scaling of pollinating insects

3 **Word count:** 7412

4

5 Liam K. Kendall<sup>1,2\*</sup>, Romina Rader<sup>1</sup>, Vesna Gagic<sup>2</sup>, Daniel P. Cariveau<sup>3</sup>, Matthias Albrecht<sup>4</sup>,

6 Katherine C. R. Baldock<sup>5</sup>, Breno M. Freitas<sup>6</sup>, Mark Hall<sup>1</sup>, Andrea Holzschuh<sup>7</sup>, Francisco P.

7 Molina<sup>12</sup>, Joanne M. Morten<sup>5</sup>, Janaely S. Pereira<sup>6</sup>, Zachary M. Portman<sup>3</sup>, Stuart P. M. Roberts<sup>8</sup>,

8 Juanita Rodriguez<sup>9</sup>, Laura Russo<sup>10</sup>, Louis Sutter<sup>4</sup>, Nicolas J. Vereecken<sup>11</sup> and Ignasi

9 Bartomeus<sup>12</sup>

10

11 1. School of Environmental and Rural Science, University of New England, Armidale, NSW 2351, Australia

12 2. CSIRO Agriculture, GPO Box 2583, Brisbane, QLD 4001, Australia

13 3. Department of Entomology, University of Minnesota, St. Paul, MN, USA

14 4. Agroscope, Agroecology and Environment, CH-8046 Zürich, Switzerland

15 5. School of Biological Sciences & Cabot Institute, University of Bristol, Bristol, BS8 1TQ, UK

16 6. Departamento de Zootecnia – CCA, Universidade Federal do Ceará, 60.356-000, Fortaleza, CE, Brazil

17 7. Animal Ecology and Tropical Biology, Biocenter, University of Würzburg, 97074 Würzburg, Germany

18 8. Centre for Agri-Environmental Research, School of Agriculture, Policy and Development, The University of Reading,  
19 Reading, RG6 6AR UK

20 9. Australian National Insect Collection, CSIRO, Canberra, ACT 2601, Australia

21 10. Botany Department, Trinity College Dublin, Ireland

22 11. Agroecology Lab, 11 Interfaculty School of Bioengineers. Université Libre de Bruxelles, Boulevard du Triomphe CP 264/2,  
23 B-1050 Bruxelles, Belgium

24 12. Dpto. Ecología Integrativa, Estación Biológica de Doñana (EBD-CSIC), 41092 Sevilla, Spain

25

26 \*Corresponding author: L. K. Kendall, Email: [liam.k.kendall@gmail.com](mailto:liam.k.kendall@gmail.com)

## 27 Abstract

- 28 1. Body size is an integral functional trait that underlies pollination-related ecological  
29 processes, yet it is often impractical to measure directly. Allometric scaling laws have  
30 been used to overcome this problem. However, most existing models rely upon small  
31 sample sizes, geographically restricted sampling and have limited applicability for  
32 non-bee taxa. Predictive allometric models that consider biogeography, phylogenetic  
33 relatedness and intraspecific variation are urgently required to ensure greater  
34 accuracy.
- 35 2. Here, we measured body size, as dry weight, and intertegular distance (ITD) of 391  
36 bee species (4035 specimens) and 103 hoverfly species (399 specimens) across four  
37 biogeographic regions: Australia, Europe, North America and South America. We  
38 updated existing models within a Bayesian mixed-model framework to test the power  
39 of ITD to predict interspecific variation in pollinator dry weight in interaction with  
40 different co-variates: phylogeny or taxonomy, sexual dimorphism and biogeographic  
41 region. In addition, we used ordinary least squares (OLS) regression to assess  
42 intraspecific dry weight – ITD relationships for 10 bee and five hoverfly species.
- 43 3. Including co-variates led to more robust interspecific body size predictions for both  
44 bees (Bayesian  $R^2$ : 0.946;  $\Delta R^2$  0.047) and hoverflies (Bayesian  $R^2$ : 0.821;  $\Delta R^2$  0.058)  
45 relative to models with ITD alone. In contrast, at the intraspecific level, our results  
46 demonstrate that ITD is an inconsistent predictor of body size for bees ( $R^2$ : 0.02 –  
47 0.66) and hoverflies ( $R^2$ : -0.11 – 0.44).
- 48 4. Therefore, predictive allometry is more suitable for interspecific comparative analyses  
49 than assessing intraspecific variation. Collectively, these models form the basis of the  
50 dynamic  $R$  package, '*pollimetry*', which provides a comprehensive resource for  
51 allometric research concerning insect pollinators worldwide.

52

53 **Keywords:** Apoidea, biogeography, body size, dry weight, pollimetry, pollination, *R* package,

54 Syrphidae

55

## 56 **Introduction**

57 Body size is an important functional trait that influences ecological patterns across all levels of  
58 biological organisation. In insects, adult body size variation is the outcome of natural selection  
59 affecting physiological and biochemical processes during ontogeny (Chown & Gaston 2010).  
60 For example, body size impacts metabolic and growth rates (Angilletta et al. 2004; Ehnes et al.  
61 2011), life history (e.g. life span and reproductive rate; Speakman 2005; Teder et al. 2008) and  
62 ecological attributes, such as species abundance, trophic interactions, geographic range size  
63 and dispersal ability (Brown et al. 2004; White et al. 2007; Stevens et al. 2012; Velghe &  
64 Gregory-Eaves 2013; DeLong et al. 2015). In addition, body size can drive key ecosystem  
65 functions and services such as decomposition, carbon cycling, predation, primary productivity  
66 and pollination (Woodward & Hildrew 2002; Greenleaf et al. 2007; Rudolf & Rasmussen 2013;  
67 Garibaldi et al. 2015; Schramski et al. 2015).

68

69 Body size is most commonly measured as specimen dry weight. As such, obtaining direct  
70 measurements can be impractical and time consuming. Direct measurements often require  
71 destructive methods, which is unfavourable for museum specimens and threatened species  
72 (Rogers et al. 1977; Henschel & Seely 1997). Additionally, species with poor life-history  
73 information, such as rare species with few specimens, may lead to inaccurate measurements of  
74 intraspecific variation. Allometric scaling laws can be used to overcome these problems. These  
75 laws refer to how traits, which can be morphological, physiological or chemical, co-vary with  
76 an organism's body size, often with important ecological and evolutionary implications (Gould

77 1966). When these scaling laws are utilised to estimate body size or a hypothesised allometric  
78 characteristic indirectly using a co-varying morphological trait, therefore circumventing the  
79 use of destructive and/or time-consuming methods, we define this as ‘predictive allometry’.

80

81 Predictive allometry has emerged across many biological disciplines. The most commonly used  
82 co-varying trait used to predict body size is body length, which has been used extensively in  
83 fish (e.g. Karachle & Stergiou 2012), mammals (e.g. Trites & Pauly 1998) and both aquatic  
84 (e.g. Burgherr & Meyer 1997) and terrestrial invertebrates (e.g. Rogers et al. 1977; Sabo et al.  
85 2002). These models often show considerable predictive power ( $R^2 > 0.9$ ), which has led to the  
86 proliferation of multiple models for a wide range of taxa (e.g. there are 26 body length – body  
87 size models for Diptera – See Supporting Information). However, when compared, these  
88 models show considerably different allometric scaling coefficients both within- and between  
89 insect orders (Schoener 1980; Sample et al. 1993; Ganihar 1997; Brady & Noske 2006).  
90 Previously, these differences have been attributed to biogeographic factors, such as latitude  
91 (Martin et al. 2014) and/or methodological influences such as sampling biases (e.g. the range  
92 of sampled body sizes, Sage 1982). Importantly, they have also notably failed to incorporate  
93 sexual size dimorphism which is common in invertebrates (Shreeves & Field 2008).

94

95 The allometry of functional traits have been shown to influence plant-pollinator interactions,  
96 specifically in bees. For example, smaller body size can be associated with preferential activity  
97 periods related to available light (Streinzer et al. 2016), whereas larger body size is associated  
98 with greater pollen load capacity (e.g. within *Melipona quadrifasciata* colonies, see Ramalho  
99 et al. 1998) as well as greater interspecific foraging distances (e.g. Greenleaf et al. 2007).  
100 Importantly, body size can both influence and constrain plant-pollinator interactions and trait  
101 matching both within and between pollinator groups (Stang et al. 2009; Bartomeus et al. 2016).

102 Therefore, allometric traits central to pollination-related ecological processes both appear and  
103 interact at the intra- and interspecific levels. Despite their ubiquity, few predictive models for  
104 body size exist for pollinating insects below the ordinal level, with one notable exception. Cane  
105 (1987) pioneered a predictive model for bee body size as a function of the intertegular distance  
106 (ITD) (the distance between the wing-attachment points on either side of the thorax (See Fig.  
107 S1). Importantly, Cane's allometric model identified the ITD as an important body size proxy  
108 and has since been used to establish other ecologically important allometric relationships,  
109 primarily at the interspecific level (e.g. foraging distances and bee proboscis length; Greenleaf  
110 et al. 2007; Cariveau et al. 2016).

111

112 The robustness of the ITD as a body size predictor has not been properly tested. First, the  
113 original model is based solely on 20 North American solitary bee species, despite evidence  
114 suggesting allometric coefficients can differ significantly between biogeographical regions  
115 (Martin et al. 2014). Second, the power of predictive allometric equations in predicting  
116 intraspecific variation has not been assessed. Third, sexual size dimorphism is present in 80%  
117 of Aculeata (Shreeves & Field 2008), highlighting the need to include sex-specific co-variation.  
118 Fourth, body size variation has been repeatedly linked to phylogeny, compelling allometric  
119 studies to incorporate species' evolutionary histories (Garland & Ives 2000; Blomberg et al.  
120 2003). Lastly, other key pollinating taxa, such as hoverflies (Diptera: Syrphidae) lack  
121 predictive models that could be used to examine allometric patterns.

122

123 These knowledge gaps are largely due to the lack of: (a) a general repository to house and  
124 connect all relevant predictive allometric models; (b) large high resolution datasets to build  
125 more accurate models that can incorporate co-variates and (c) the absence of an iterative  
126 framework, such as those utilised in ecological forecasting (e.g. Dietze et al. 2018; Harris et al.

127 2018) to continuously update existing models with new datasets, methodologies and  
128 technologies. Addressing these key deficiencies will increase model accuracy and applicability  
129 of predictive allometry for pollinating insects.

130

131 Here, we catalogue pre-existing models for key pollinating insect taxa (Diptera, Hymenoptera  
132 and Lepidoptera) and develop new predictive allometric models within an iterative framework  
133 for bees and hoverflies that incorporate species evolutionary histories, intraspecific variation  
134 and biogeography. These form the basis of a new *R* package, entitled “*pollimetry*”. Specifically,  
135 we address the following research questions:

- 136 i. Is ITD a robust predictor of inter-specific body size variation for two dominant  
137 pollinator taxa, bees and hoverflies?
- 138 ii. Does incorporating sexual dimorphism and phylogenetic/taxonomic relatedness when  
139 constrained by biogeographic region improve interspecific predictions of pollinator  
140 body size by ITD?
- 141 iii. Is ITD reliable in predicting intraspecific variation in both bees and hoverflies and what  
142 sample size is required to accurately estimate intraspecific body size and co-varying  
143 trait values?

144

## 145 **Materials and Methods**

146

### 147 *Specimen collection and measurements*

148 We obtained specimens collected in recent field research projects on insect pollinator diversity.  
149 We included studies across four continents. In Australia, collections were made in New South  
150 Wales, Victoria, Queensland, South Australia and the Northern Territory. In Europe, we  
151 amassed specimens from Belgium, UK, Germany, Ireland, Spain and Switzerland. In the

152 Americas, we included collections from Minnesota, USA and Ceara, Brazil. In addition, Cane’s  
153 (1987) original data from Alabama, USA was obtained using Engauge Digitizer version 10.6  
154 (Mitchell et al. 2018).

155

156 The majority of specimens were dehydrated and weighed within three to six months of  
157 collection, although some, in particular, those from Victoria, Australia, Belgium, Switzerland  
158 and Cane’s original samples were of variable ages: ranging from one to five years since  
159 collection. We excluded damaged specimens. For every specimen, we obtained sample location  
160 (latitude and longitude) and taxonomic identity. Full information about specimen  
161 identification, deposition locations and used taxonomic resources are provided in the  
162 Supporting Information.

163

#### 164 *Body size and intertegular distance*

165 Body size was measured as the dry weight in milligrams of each specimen. We therefore refer  
166 to body size as dry weight herein for continuity. Dry weight was measured by first dehydrating  
167 specimens at 70 °C for at least 24hrs prior to weighing to remove residual humidity and then  
168 weighed on an analytical balance to an accuracy of 0.001g. All North American bees as well  
169 as small-bodied Australian bees were dehydrated and weighed prior to pinning. For all other  
170 specimens, pins were not removed prior to weighing. Instead, we identified the pin type and  
171 weighed a sample of 10 – 50 pins per type. The mean weight was then subtracted off the total  
172 weight. Pin weight variance was minimal (range of standard errors:  $6.3 \times 10^{-4}$  to 2mg).  
173 Intertegular distance was measured in millimetres using a stereo-microscope, either mounted  
174 with a calibrated scale or microscope camera. Body length was measured along the lateral side  
175 of each specimen with a calibrated scale or microscope camera for Australian, British, German,

176 Irish and Spanish specimens (see Supporting Information for visual representation of ITD and  
177 body length measurements).

178

179 *Data analysis: Model structures*

180 All analyses were undertaken in *R* (version 3.5.1) (R Core Team 2018). We first assessed the  
181 Pearson's correlation coefficient between ITD and body length. ITD and body length (BL)  
182 were highly correlated in both bees ( $\rho = 0.932$ ), and hoverflies ( $\rho = 0.853$ ). We then compared  
183 both ITD and body length independently in predicting body size using ordinary least squares  
184 (OLS) regression to select the best body weight predictor. ITD was marginally more predictive  
185 than BL in estimating dry weight in bees: ITD  $R^2$ : 0.896; BL  $R^2$ : 0.877, and considerably better  
186 than BL for hoverflies: ITD  $R^2$ : 0.854; BL  $R^2$ : 0.796. Hence, we used ITD in the following  
187 analyses.

188

189 As traditionally performed, we used log-transformed values in the model formulation because  
190 allometric relationships are typically described by a power function ( $y = ax^b$ ) which is  
191 linearised when log-transformed:

$$192 \quad \ln(y) = \ln(\alpha) + \beta * \ln(x)$$

193 where  $Y$  = dry weight,  $\alpha$  = intercept,  $\beta$  = allometric co-efficient and  $x$  = dry weight or body  
194 length.

195

196 OLS does not allow for the incorporation of random effects or phylogenetic co-variance  
197 matrices. Therefore, to incorporate these more complex model structures with the best predictor  
198 (i.e. ITD) of dry weight, we specified Bayesian generalised linear mixed models (GLMM)  
199 using the *brms* package (version 2.4.0) (Bürkner 2017). Log-transformed dry weight was  
200 predicted as a function of the log-transformed ITD in interaction with sex and taxonomic



201 grouping: bee families following Michener (2000) and hoverfly subfamilies following  
202 Thompson and Rotheray (1998). We included a nested random effect: species nested within  
203 their biogeographic region of origin. A few specimens from five bee species: *Andrena wilkella*  
204 (North America), *Halictus rubicundus* (North America), *Lasioglossum leucozonium* (North  
205 America), *Anthidium manicatum* (North America) and *Apis mellifera* (Australia), were  
206 removed from their introduced ranges (in parentheses) prior to analyses. We call these models  
207 taxonomic GLMMs. Both bee and hoverfly models were run for 2000 iterations with a burn-in  
208 of 1000. We set  $\Delta$  to 0.99 and manipulated maximum tree depth between 10 and 20 for  
209 individual models to avoid divergent transitions. We fitted each model with weakly informative  
210 priors on both fixed and random effects based off our domain expertise; priors are explicitly  
211 provided in accompanying R code. Chain convergence was assessed using the  $\hat{R}$  statistic  
212 (Gelman & Rubin 1992). Posterior predictive checks were visualised using the *Bayesplot*  
213 package (version 1.6.0; Gabry & Mahr 2017).

214

#### 215 *Data analysis: Incorporating phylogeny*

216 We explored the influence of phylogenetic relatedness in predicting dry weight for bees only  
217 because a well-resolved hoverfly phylogeny was not available. We constructed an applicable  
218 phylogeny for our dataset using a bee genera backbone tree (Hedtke et al. 2013). We removed  
219 non-represented genera using the *ape* package (version 5.1; Paradis et al. 2004). Species tips  
220 were added to genera nodes as simulated pure-birth subtrees using the *phytools* package  
221 (version 0.6-44; Revell et al. 2012). This excluded a total of three species (*Flavipanurgus*  
222 *venustus*, *Protomeliturga turnerea* and *Tetrapedia diversipes*), whose genera weren't included  
223 in Hedtke et al. (2013)'s phylogeny.

224

225 As such, we made the explicit assumption that phylogenetic patterns in body size were  
226 assessed at and above the genus level. We estimated relative node ages using the mean path  
227 lengths method of Britton et al. (2002). We assessed the significance of phylogenetic signal  
228 using Pagel's  $\lambda$  (Pagel 1999) with the *phytools* package (version 0.6-44; Revell et al. 2012).  
229 Phylogenetic signal was highly significant for bee ln body size ( $\lambda$ : 0.793,  $p < 0.001$ ) (Fig. 1).  
230 Therefore, we implemented a nested phylogenetic generalised linear mixed model (PGLMM)  
231 which considered ITD in interaction with intraspecific sexual dimorphism whilst accounting  
232 for phylogenetic dependencies through a nested random term: species nested within region (i.e.  
233 the nested species term was constrained by the constructed phylogeny). We refer to these  
234 models as phylogenetic GLMMs.

235

#### 236 *Data analysis: Model selection: Bayesian $R^2$ and K-fold cross-validation*

237 We first fitted the two full models described above; a taxonomic GLMM and a phylogenetic  
238 GLMM. As we were interested in their predictive power, these models were then compared  
239 against reduced models (i.e. without sex as either intercepts/slopes) including random effects  
240 along with two ITD-only models, one with and one without random terms (Table 1) in order  
241 to select the most suitable models for inclusion in the *R* package. We chose to rank our models  
242 based upon their Bayesian  $R^2$  and K-fold cross-validation (CV) weighting as the Widely-  
243 applicable information criterion (WAIC) and Leave-one-out information criterion (LOOIC)  
244 were inappropriate due to pWAIC estimates of  $>0.4$  and Pareto k estimates of  $>0.7$  (Gelman et  
245 al. 2017; Vehtari et al. 2017). To calculate K-fold CV, species mean datasets were divided into  
246 10 equal sets containing a random subset of species. Each model was then evaluated iteratively  
247 upon each k-1 set (training set consisting of nine sets) by comparing the actual and predicted  
248 values within the one left out 'test' set. This was done repeatedly so each set was both the test

249 set and contained within the training sets from which an information criterion weighting was  
250 then calculated.

251

252 *Model comparisons: Root mean square error (RMSE)*

253 We assessed the predictive error of all formulated models on the basis of the root-mean square  
254 error (RMSE), which is expressed in the same units of the response variable, between observed-  
255 predicted dry weight values and compared these point-estimates of error between our models  
256 and predicted values from Cane (1987)'s original model. Lastly, we calculated RMSE for  
257 observed-predicted values from existing body length models for both taxa and our body length  
258 measurements.

259

260 *Data analysis: Intraspecific predictions*

261 We assessed the utility of ITD in predicting intraspecific dry weight variation. For the 10 most  
262 abundant bee species of a given sex (nine using females, one using males) and five most  
263 abundant hoverfly species (all using females) we tested the utility of ITD in predicting  
264 intraspecific body size variation using species-level OLS regression.

265

266 To estimate the adequate sample size needed for robust mean trait measures for each bee  
267 species, we plotted trait means independently against increasing sample size. We then inferred  
268 the adequate sample size whereby variance stabilised within the 95% confidence intervals of  
269 the actual sample size.

270

271 **Results**

272

273 *Pre-existing models*

274 We collated 26 predictive allometric models for Diptera, 38 for Hymenoptera and 21 for  
275 Lepidoptera groups. We also gathered nine equations for bee foraging distance from two  
276 sources (van Nieuwstadt & Iraheta 1996; Greenleaf et al. 2007) and one allometric model for  
277 estimating bee tongue length (Cariveau et al. 2016) (See Supporting Information).

278

### 279 *Species and specimen distribution*

280 In total, we measured 391 bee species (4035 specimens) from Australia, Europe, North  
281 America and South America and measured 103 hoverfly species (399 specimens) from  
282 Australia and Europe (Supporting Information). Six out of seven bee families (all except  
283 Stenotritidae) and two hoverfly subfamilies (Syrphinae and Eristalinae) were represented. The  
284 mean specimen number per bee species was nine (♀) and five (♂) and ranged from one – 201.  
285 In hoverflies, the mean specimen number per species was three for both sexes and ranged from  
286 one – 50. In bees, when dry weight variation was visualised across the phylogeny (Fig. 1), large  
287 dry weight was most evident within the Apidae, the largest bee in our dataset being the South  
288 American *Xylocopa frontalis* (♀ mean weight: 760.75mg). In contrast, Halictid (i.e. *Halictus*,  
289 *Homalictus* and *Lasioglossum* species) and Colletid bees, in particular, the Australian *Euhesma*  
290 sp. (♀ mean weight: 0.71mg, ♂ mean weight: 0.66mg) and the European *Hylaeus communis*  
291 (♀ mean weight: 6.15mg, ♂ mean weight: 2.76mg) were considerably small.

292

### 293 *Interspecific model selection and performance*

294 All three tested co-variables exhibited significant influences on the allometric scaling of ITD  
295 (Fig. 2, Table 1). For bees, both GLMM and PGLMM analyses indicated that models including  
296 family or phylogeny and sex in interaction or in addition with ITD, along with our nested  
297 random term better predicted dry weight relative to the baseline model (ITD-only model  
298 without random term) on the basis of K-fold CV and Bayesian  $R^2$  (Table 2;  $\Delta R^2$ : 0.046,  $\Delta K$ -

299 fold CV: 2226.6). However, differences in K-fold CV and Bayesian  $R^2$  between the best-fitting  
300 taxonomic and phylogenetic models were minimal ( $\Delta R^2 < 0.001$ ,  $\Delta$ K-fold CV: 7.92). In  
301 hoverflies, incorporating taxonomy and/ sex increased body size predictions relative to the  
302 baseline ITD-only models considerably ( $\Delta R^2$ : 0.058,  $\Delta$ K-fold CV: 73.3).

303

304 Increases in model performance as a result of incorporating co-variates were most pronounced  
305 in bees in terms of root mean square error (RMSE) (Fig. 3). All formulated models  
306 outperformed ITD-only models in their predictive precision. RMSE ranged between 10.804 –  
307 12.462mg for both taxonomic and phylogenetic GLMMs. The RMSE for the baseline ITD-  
308 only model was 15.565mg, which was near-identical the RMSE for Cane's (1987) original  
309 model: 15.553mg. The RMSE for taxonomic GLMMs for hoverflies ranged from 4.619mg to  
310 4.849mg and all were slightly lower than the RMSE of the baseline ITD-only model (6.179mg).  
311 The range of prediction error for ITD was also considerably lower than any pre-existing and  
312 applicable model using body length:  $36.36\text{mg} \pm 8.29$  for bees and  $7.99\text{mg} \pm 0.69$  for hoverflies.

313

#### 314 *Intra-specific predictions*

315 Across the 10 most abundant species of bees ( $\text{♀}$  *Andrena flavipes*,  $\text{♀}$  *A. nigroaenea*,  $\text{♂}$  *Bombus*  
316 *impatiens*,  $\text{♀}$  *B. lapidarius*,  $\text{♀}$  *B. terrestris*,  $\text{♀}$  *Homalictus urbanus*,  $\text{♀}$  *Lasioglossum*  
317 *glabriusculum*,  $\text{♀}$  *L. lanarium*,  $\text{♀}$  *L. pauxillum* and  $\text{♀}$  *Trigona spinipes*) and five most abundant  
318 hoverflies ( $\text{♀}$  *Austrosyrphus* sp. 1,  $\text{♀}$  *Episyrphus balteatus*,  $\text{♀}$  *Helophilus parallelus*,  $\text{♀}$   
319 *Melanostoma scalare* and  $\text{♀}$  *Sphaerophoria macrogaster*), the strength of intraspecific  
320 predictions of body size using ITD varied considerably (Table 3; Fig. 3). All bee species  
321 exhibited a significant relationship, however the adjusted- $R^2$  differed considerably from 0.02  
322 in *Homalictus urbanus* to 0.66 for *Bombus lapidarius*. Similarly, three of five hoverfly species,  
323 *Austrosyrphus* sp., *Helophilus parallelus* and *Melanostoma scalare* exhibited a significant

324 relationship. In order to accurately determine mean ITD and dry weight values for bees, a  
325 sample size of 20-30 specimens is required for trait values to stabilise within the 95%  
326 confidence intervals of the total sample size (See Supporting Information).

327

### 328 *Summary of R package functions*

329 The developed *R* package, '*pollimetry*', integrates models for estimating body size (i.e. dry  
330 weight) in bees and hoverflies using the ITD and co-variates (see Table 2), which were  
331 parameterized with the enclosed dataset, into a wrapper function that returns body size  
332 estimates, along with standard error and 95% credible intervals. In addition, *pollimetry* includes  
333 functions for estimating pollinator dry weight using pre-existing models which utilise the  
334 following co-varying traits: body length, head width and body length \* body width; see  
335 Supporting Information). The *R* package also includes functions for estimating bee foraging  
336 distances using the ITD (Greenleaf et al. 2007) or head width (van Nieuwstadt & Iraheta 1996),  
337 as well as models for estimating bee tongue length using the ITD and taxonomic family  
338 (Cariveau et al. 2016). The equations will be updated in future package releases as novel data  
339 become available and models are re-fit to these new data.

340

### 341 **Discussion**

342 We present the most comprehensive examination of allometric scaling for predictive means for  
343 two important pollinating insect taxa: bees and hoverflies. We propose an iterative framework  
344 to develop and test this suite of highly predictive dynamic allometric models that consider  
345 allometric scaling variation attributable to phylogenetic relatedness, sexual dimorphism and  
346 biogeographic differentiation.

347

348 Incorporating phylogenetic information is a cornerstone of comparative biological analyses,  
349 especially in studies concerning body size variation. Phylogenetic signal in body size variation  
350 has been inferred in a number of vertebrate and invertebrate groups (Ashton 2004). Failing to  
351 account for dependent phylogenetic patterns is argued to heighten the risk of inaccurate  
352 predictions (Martins et al. 2002; Garland et al. 2005). In our study, both PGLMM and GLMM  
353 models were comparable in terms of predictive power as well as parameter values.  
354 Interestingly, taxonomic and phylogenetic GLMM models were near-identical in all model  
355 rankings (Bayesian  $R^2$ , K-fold CV and RMSE), demonstrating that differential allometric  
356 scaling is present at/or below the familial level. These results suggest that predictive inferences  
357 of body size above the family level lack accuracy and generalisability.

358

359 Where the aim is prediction, GLMMs incorporating taxonomic groupings without considering  
360 phylogeny are more practical given well-resolved phylogenies are lacking for most groups (e.g.  
361 one can predict allometric relationships for non-represented species). A further advantage of  
362 using taxonomic groupings over phylogeny is that they provide easy-to-interpret regression  
363 intercepts and/or slopes as opposed to a phylogenetic co-variance matrix. Therefore, for bees,  
364 we confirm that incorporating taxonomy is predictively equivalent in predicting allometric  
365 scaling relationships where phylogenetic information is unavailable. Importantly, this  
366 uniformity between taxonomic and phylogenetic models may not exist for other taxa with  
367 either high paraphyly or low correspondence between taxonomy and phylogeny. In hoverflies,  
368 including subfamily was less informative, yet still retained, in describing body size variation,  
369 potentially due to their lower taxonomic ranking. In essence, our results suggest that where  
370 previous studies have used taxonomy (i.e. bee families in Cariveau et al. 2016), results are  
371 predictively comparable to incorporating phylogeny.

372

373 Sex was retained as an integral predictor either in addition or in interaction with ITD for both  
374 taxa. Sexual size dimorphism (SSD) is common among insects. In both Diptera and  
375 Hymenoptera, 80% of previously-studied species exhibit female-biased SSD including in  
376 Apoidea and Syrphidae (Shreeves & Field 2008; Francuski et al. 2011). Female-biased SSD is  
377 hypothesised to be a result of greater fitness and increased fecundity as a result of larger female  
378 body size (Stillwell et al. 2010). In bees, SSD is attributed to the physical requirements of nest  
379 provisioning and construction (Shreeves & Field 2008). This suggests that intraspecific sex  
380 differences in the allometric scaling of ITD may reflect the presence of sex-specific  
381 morphologies such as the presence of specialised morphological structures for resource  
382 collection (i.e. scopal hairs and corbiculae) as well as self-preservation (i.e. a stinger) in female  
383 bees.

384

385 In hoverflies, SSD was also notably female-biased, with sex retained as an important body size  
386 predictor in conjunction with the ITD. However, few examples of morphological sexual  
387 dimorphism exist. In both taxa, including sex increased model precision by <math>4.25-1.38\text{mg}</math>  
388 RMSE, highlighting the predictive accuracy of the ITD even when sex is not considered.  
389 Therefore, failing to incorporate sex in predictions will only introduce a subtle error. Sex is  
390 easily identifiable in both bees and hoverflies. Therefore, we recommend its inclusion if  
391 predictive allometries are used as many ecologically relevant allometric traits are sex-related  
392 (e.g. flight distances; Kraus et al. 2009).

393

394 Few previous studies have assessed the utility of predictive models in describing intrageneric  
395 or intraspecific allometric traits (e.g. Hagen & Dupont 2013; Cariveau et al. 2016). Our results  
396 suggest that intraspecific body size variation is difficult to predict accurately using co-varying  
397 traits such as the ITD. In particular, the large variation in predictive power suggests that it is



398 sensitive to environmental conditions and/or sample sizes. Adult body size variation in  
399 holometabolous insects is a direct result of diet and environment during ontogeny and larval  
400 development (Davidowitz et al. 2004). For example, within *Bombus* species, brood sizes  
401 increase throughout the season in response to colony population increases (Inoue 1992). These  
402 intra-specific patterns raise the question of how many individuals are necessary to measure to  
403 accurately capture species' mean trait values. Based on our examination of trait-sample size  
404 relationships we can provide a recommendation that measuring 20-30 specimens per species  
405 will lead to accurate estimation intraspecific body size and morphological trait values. By  
406 applying our iterative framework, we aim to reduce the noise in interspecific models due to  
407 low sample sizes in some species by incorporating novel data sets.

408

409 Terrestrial invertebrates show considerable biogeographic variation in body shape and size.  
410 While previous studies have compared predictive allometries between biogeographical regions  
411 either independently (Schoener 1980) or within a meta-analytical framework (Martin et al  
412 2014), we chose to represent biogeographical variation within a random effect structure. This  
413 makes these models broadly applicable and not biogeographically restricted in utility.  
414 Observed biogeographical differences within this study likely arise from differing species  
415 diversification patterns as well as from sampling biases, such as variation in commonality  
416 among species. Therefore, discerning hypotheses that explain biogeographic variation in the  
417 allometric scaling of ITD is problematic. However, it is clear that the influence of biogeography  
418 appears alongside species' evolutionary histories and intraspecific variation.

419

420 By incorporating phylogeny or taxonomy, sexual dimorphism and biogeographic random  
421 effects we improved model predictions and reduced the limitations of traditional predictive  
422 allometry. These three predictors represent fundamentally-related causes of body size variation

423 in pollinating insects. In consideration of the multiple metrics (i.e. Bayesian  $R^2$ , K-fold CV,  
424 and RMSE) used in model selection and performance, we provide multiple, near-equally  
425 accurate predictive models. This is important as research questions may not garner  
426 investigation of sex-related allometric differences and may occur outside the included  
427 biogeographic regions. Therefore, disseminating the most appropriate allometric model  
428 becomes a hypothesis-driven formula that should consider and then discount each examined  
429 factor. Importantly, given the high resolution across our described models and large sample  
430 size of specimens within our study, our models will improve body size predictions relative to  
431 pre-existing models even when considering only ITD. After accounting for biogeographical  
432 and species-level effects, failing to incorporate sex or phylogeny/taxonomy will not result in  
433 considerable error (see Fig. 3) although we endorse their use as it enables more meaningful  
434 analyses. Lastly, we caution the use of ordinal-level predictive models as allometric constraints  
435 are ubiquitous at the familial level (See Fig. 1).

436

### 437 *Conclusions and implications*

438 The accompanying R package, “*pollimetry*”, provides a user-friendly interface to estimate  
439 pollinator body size (as dry weight) and modelled allometric traits. Practical predictive  
440 allometric libraries require multiple models that are continually updated when novel datasets  
441 become available. This will enable robust investigation of other allometric traits at both intra-  
442 or inter-specific levels. The consequences of body size variation are ubiquitous within  
443 pollination research, yet few have utilised allometric theory in studying pollinating taxa beyond  
444 bees. Adding hoverflies is an important first step, yet this comprehensive approach to  
445 predictive allometric model development should be applied to other pollinating taxa, such as  
446 moths and butterflies. The iterative framework used herein heralds a dynamic new direction

447 for predictive allometry and will provide more accurate predictions through hypothesis-led  
448 model choice, testing and investigation in allometric research.

449

#### 450 *Acknowledgements*

451 The authors would like to thank K. Freidrich, A. Irber, L. Kirkland, J. Krauss, L. Kuehn, J. B.  
452 Lanuza and J. Lumbers for providing specimens, R. Bärffuss for identifying Swiss hoverflies,  
453 S. Gerber, M. Herrmann and A. Müller for identifying Swiss bees, K. Mandery for identifying  
454 German specimens, S. Wright for identifying Australian hoverflies, O. Aguado for identifying  
455 Spanish specimens and A. Pauly for identifying Belgian Halictidae. Finally, we thank M.  
456 Betancourt for statistical advice. This study was funded by the BeeFun project (PCIG14-GA-  
457 2013-631653), a CSIRO PhD top-up scholarship and an Ian Potter Foundation PhD scholarship  
458 grant to LKK and an Australian Research Council Discovery Early Career Researcher Award  
459 DE170101349 to RR.

460

#### 461 *Data availability*

462 All data including R code and the R package are available here:  
463 <https://github.com/liamkendall/pollimetry> DOI:10.5281/zenodo.1313905

464

#### 465 *Author contributions*

466 IB, LKK, VG and RR conceived the study. LKK, VG, JR and MH collected Australian  
467 specimens. LKK measured Australian, German and Swiss specimens. LKK and MH identified  
468 Australian bees. ZMP identified North American specimens. LR collected, identified and  
469 measured Irish specimens. JMM collected and identified British specimens. FPM collected,  
470 identified and measured Spanish specimens. NJV and SPMR collected, identified and  
471 measured Belgian specimens. MA and LS collected and identified Swiss specimens. LKK, IB,

472 and VG devised and undertook all data analyses. LKK and IB formulated and wrote the R  
473 package. LKK wrote the manuscript and all authors contributed significantly to the final  
474 manuscript.

475

476

477 Table 1. Model selection tables for bee and hoverfly interspecific models. Models in bold are those included in the *R* package. Model types: i)  
478 Taxo. GLMM: taxonomic generalised linear mixed models and ii) Phylo GLMM: phylogenetic generalised linear mixed model. lnITD: ln  
479 intertegular distance (mm), Subf: Subfamily,  $R^2$ : Bayesian  $R^2$ , K-CV: K-fold cross validation,  $\Delta$ :  $\Delta$ K-fold CV and RMSE: root-mean square  
480 error. Estimates of best models are shown in Supporting Information.

| Taxa     | Model formulae                                                                                              | $R^2$        | K-CV          | $\Delta$     | RMSE          |
|----------|-------------------------------------------------------------------------------------------------------------|--------------|---------------|--------------|---------------|
| <b>1</b> | <b>Bees</b>                                                                                                 |              |               |              |               |
|          | <b>ln(Dry weight) ~ ln(ITD) + Family + Sex+ Family:ln(ITD) + Sex:ln(ITD) + (1   Region/Species)</b>         | <b>0.946</b> | <b>2763.7</b> | <b>0.0</b>   | <b>11.313</b> |
| <b>2</b> | ln(Dry weight) ~ ln(ITD) + Family + Sex + Sex:ln(ITD) + (1   Region/Species)                                | 0.946        | 2774.3        | 10.7         | 11.216        |
| <b>3</b> | ln(Dry weight) ~ ln(ITD) + Family + Sex + (1   Region/Species)                                              | 0.946        | 2778.2        | 14.5         | 11.629        |
| <b>4</b> | <b>Taxo.</b><br><b>GLMM</b> ln(Dry weight) ~ ln(ITD) + Family + Sex + Family:ln(ITD) + (1   Region/Species) | 0.946        | 2790.9        | 27.3         | 11.588        |
| <b>5</b> | ln(Dry weight) ~ ln(ITD) + Family + (1   Region/Species)                                                    | 0.943        | 2945.3        | 181.7        | 12.092        |
| <b>6</b> | ln(Dry weight) ~ ln(ITD) + Family + Family:ln(ITD) + (1   Region/Species)                                   | 0.943        | 2951.5        | 187.9        | 12.462        |
| <b>7</b> | <b>ln(Dry weight) ~ ln(ITD) + (1   Region/Species)</b>                                                      | <b>0.942</b> | <b>2985.9</b> | <b>222.3</b> | <b>11.896</b> |
| <b>8</b> | ln(Dry weight) ~ ln(ITD)                                                                                    | 0.898        | 4990.2        | 2226.6       | 15.565        |
| <b>1</b> | <b>Phylo.</b><br><b>GLMM</b> <b>ln(Dry weight) ~ ln(ITD) + Sex + Sex:ln(ITD) + (1 Region/Species)</b>       | <b>0.946</b> | <b>2771.6</b> | <b>0</b>     | <b>11.06</b>  |
| <b>2</b> | ln(Dry weight) ~ ln(ITD) + Sex + (1 Region/Species)                                                         | 0.946        | 2786.8        | 15.2         | 11.321        |
| <b>3</b> | ln(Dry weight) ~ ln(ITD) + (1 Region/Species)                                                               | 0.943        | 3004.1        | 232.5        | 11.758        |
| <b>1</b> | <b>Hoverflies</b>                                                                                           |              |               |              |               |
|          | <b>ln(Dry weight) ~ ln(ITD) + Subf + Sex + Subf:ln(ITD) + Sex:ln(ITD) + (1 Region/Species)</b>              | <b>0.821</b> | <b>526.1</b>  | <b>0</b>     | <b>4.776</b>  |
| <b>2</b> | ln(Dry weight) ~ ln(ITD) + Subf + Sex + Sex:ln(ITD) + (1 Region/Species)                                    | 0.82         | 530.2         | 4.1          | 4.707         |
| <b>4</b> | ln(Dry weight) ~ ln(ITD) + Subf + Sex + Subf:ln(ITD) + (1 Region/Species)                                   | 0.822        | 533.1         | 7            | 4.713         |
| <b>5</b> | <b>Taxo.</b><br><b>GLMM</b> ln(Dry weight) ~ ln(ITD) + Subf + Sex + (1 Region/Species)                      | 0.821        | 538.9         | 12.8         | 4.624         |
| <b>6</b> | ln(Dry weight) ~ ln(ITD) + Subf + (1 Region/Species)                                                        | 0.811        | 547.8         | 21.7         | 4.765         |
| <b>7</b> | ln(Dry weight) ~ ln(ITD) + Subf + Subf:ln(ITD) + (1 Region/Species)                                         | 0.812        | 549.5         | 23.4         | 4.838         |
| <b>8</b> | <b>ln(Dry weight) ~ ln(ITD) + (1 Region/Species)</b>                                                        | <b>0.81</b>  | <b>554.5</b>  | <b>28.4</b>  | <b>4.8</b>    |
| <b>9</b> | ln(Dry weight) ~ ln(ITD)                                                                                    | 0.762        | 599.4         | 73.3         | 6.158         |

481

482

483 Table 2. Model parameters of intraspecific ln (dry weight) - ln intertegular distance (ITD) relationships. F: F-statistic and degrees of freedom for  
 484 each model.  $\alpha$ : intercept,  $\beta$ : ITD co-efficients  $\pm$  standard error,  $R^2$ : Adjusted  $R^2$  and P: p-value.

| Taxa     | Region        | Taxonomic ranking      | Species                             | F <sub>(df)</sub>        | $\alpha$           | $\beta$           | $R^2$ | P      |
|----------|---------------|------------------------|-------------------------------------|--------------------------|--------------------|-------------------|-------|--------|
| Bee      | Europe        | Andrenidae: Andreninae | ♀ <i>Andrena flavipes</i>           | 17.63 <sub>(1,70)</sub>  | 1.575 $\pm$ 0.367  | 1.73 $\pm$ 0.412  | 0.189 | <0.001 |
|          | Europe        | Andrenidae: Andreninae | ♀ <i>Andrena nigroaenea</i>         | 30.17 <sub>(1,50)</sub>  | 0.893 $\pm$ 0.488  | 2.459 $\pm$ 0.448 | 0.364 | <0.001 |
|          | North America | Apidae: Apinae         | ♂ <i>Bombus impatiens</i>           | 20.14 <sub>(1,66)</sub>  | 2.128 $\pm$ 0.365  | 1.275 $\pm$ 0.284 | 0.222 | <0.001 |
|          | Europe        | Apidae: Apinae         | ♀ <i>Bombus lapidarius</i>          | 110.2 <sub>(1,54)</sub>  | 0.277 $\pm$ 0.343  | 2.761 $\pm$ 0.263 | 0.665 | <0.001 |
|          | Europe        | Apidae: Apinae         | ♀ <i>Bombus terrestris</i>          | 137.8 <sub>(1,81)</sub>  | 1.242 $\pm$ 0.274  | 2.136 $\pm$ 0.182 | 0.625 | <0.001 |
|          | Australia     | Halictidae: Halictinae | ♀ <i>Homalictus urbanus</i>         | 6.055 <sub>(1,209)</sub> | -0.164 $\pm$ 0.033 | 1.166 $\pm$ 0.474 | 0.024 | 0.014  |
|          | Europe        | Halictidae: Halictinae | ♀ <i>Lasioglossum glabriusculum</i> | 6.444 <sub>(1,47)</sub>  | 0.302 $\pm$ 0.127  | 2.802 $\pm$ 1.104 | 0.102 | 0.014  |
|          | Europe        | Halictidae: Halictinae | ♀ <i>Lasioglossum lanarium</i>      | 53.87 <sub>(1,61)</sub>  | 0.702 $\pm$ 0.198  | 2.13 $\pm$ 0.29   | 0.46  | <0.001 |
|          | Europe        | Halictidae: Halictinae | ♀ <i>Lasioglossum pauxillum</i>     | 37.46 <sub>(1,129)</sub> | 0.488 $\pm$ 0.057  | 2.715 $\pm$ 0.444 | 0.219 | <0.001 |
|          | South America | Apidae: Apinae         | ♀ <i>Trigona spinipes</i>           | 0.285 <sub>(1,48)</sub>  | 2.144 $\pm$ 0.243  | 0.287 $\pm$ 0.537 | -0.02 | 0.596  |
| Hoverfly | Australia     | Syrphidae: Syrphinae   | ♀ <i>Austrosyrphus</i> sp. 1        | 12.7 <sub>(1,30)</sub>   | 0.087 $\pm$ 0.458  | 2.032 $\pm$ 0.57  | 0.274 | 0.001  |
|          | Europe        | Syrphidae: Syrphinae   | ♀ <i>Episyrphus balteatus</i>       | 0.08 <sub>(1,8)</sub>    | 1.334 $\pm$ 1.885  | 0.885 $\pm$ 2.229 | -0.11 | >0.1.  |
|          | Europe        | Syrphidae: Eristalinae | ♀ <i>Helophilus parallelus</i>      | 14.84 <sub>(1,17)</sub>  | 0.286 $\pm$ 0.857  | 2.485 $\pm$ 0.645 | 0.435 | 0.001  |
|          | Europe        | Syrphidae: Syrphinae   | ♀ <i>Melanostoma scalare</i>        | 6.38 <sub>(1,7)</sub>    | -2.172 $\pm$ 1.324 | 7.619 $\pm$ 3.016 | 0.4   | 0.03   |
|          | Australia     | Syrphidae: Syrphinae   | ♀ <i>Sphaerophoria macrogaster</i>  | 0.04 <sub>(1,8)</sub>    | 0.361 $\pm$ 0.274  | 0.195 $\pm$ 0.907 | -0.11 | >0.1.  |

485

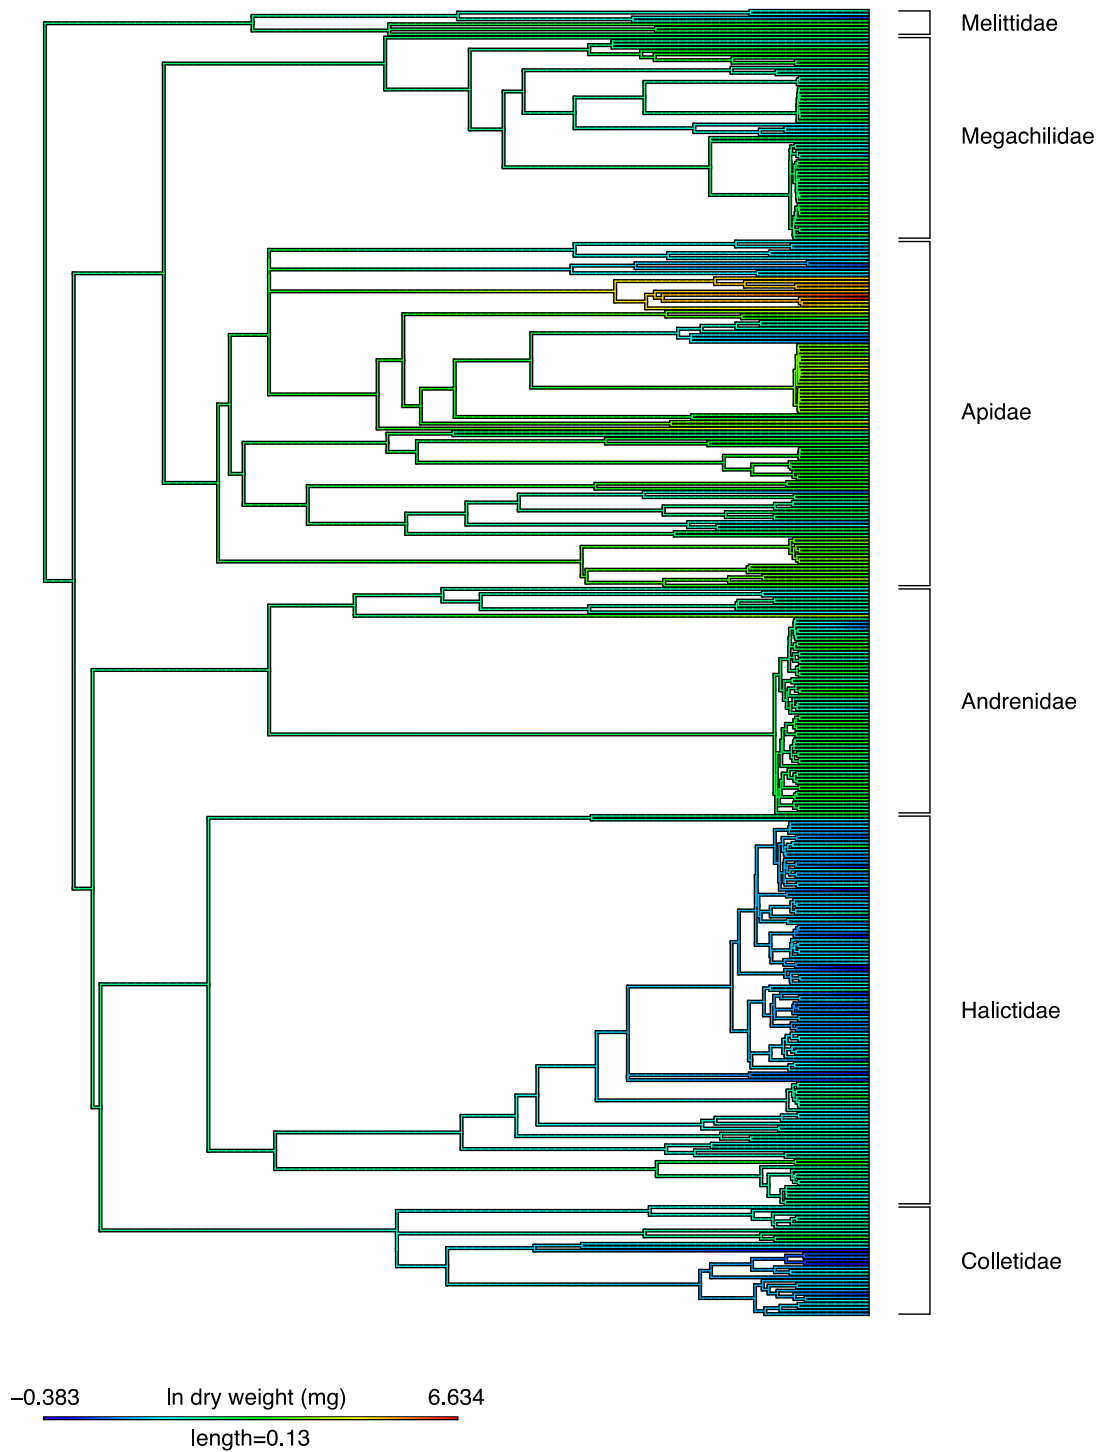

486

487 Fig. 1. Chronogram of bee genera (Hedtke et al. 2013) with simulated species subtrees.

488 Branch lengths correspond to relative time since divergence. Colour denotes mean ln dry

489 weight (mg) of each bee species.

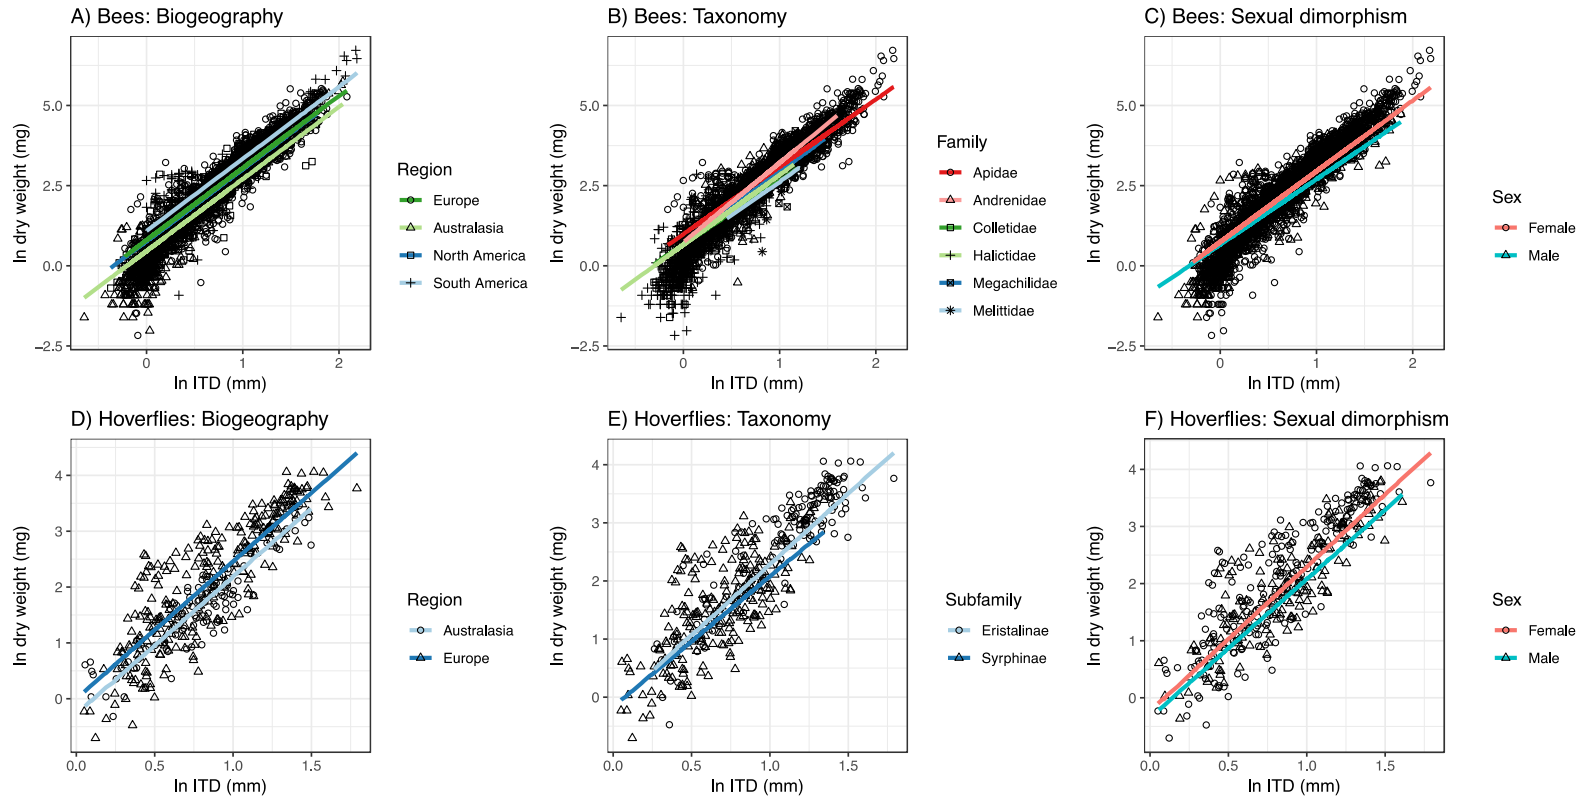

491

492 **Fig. 2.** Dry weight (mg) ~ Intertegular distance (ITD) interspecific relationships. From left to right: influence of biogeographic region,  
 493 taxonomic grouping and sexual dimorphism. Lines represent the posterior fits from Bayesian generalised linear mixed models. 95% credible  
 494 intervals are omitted for clarity. See Supporting Information for model co-efficients.



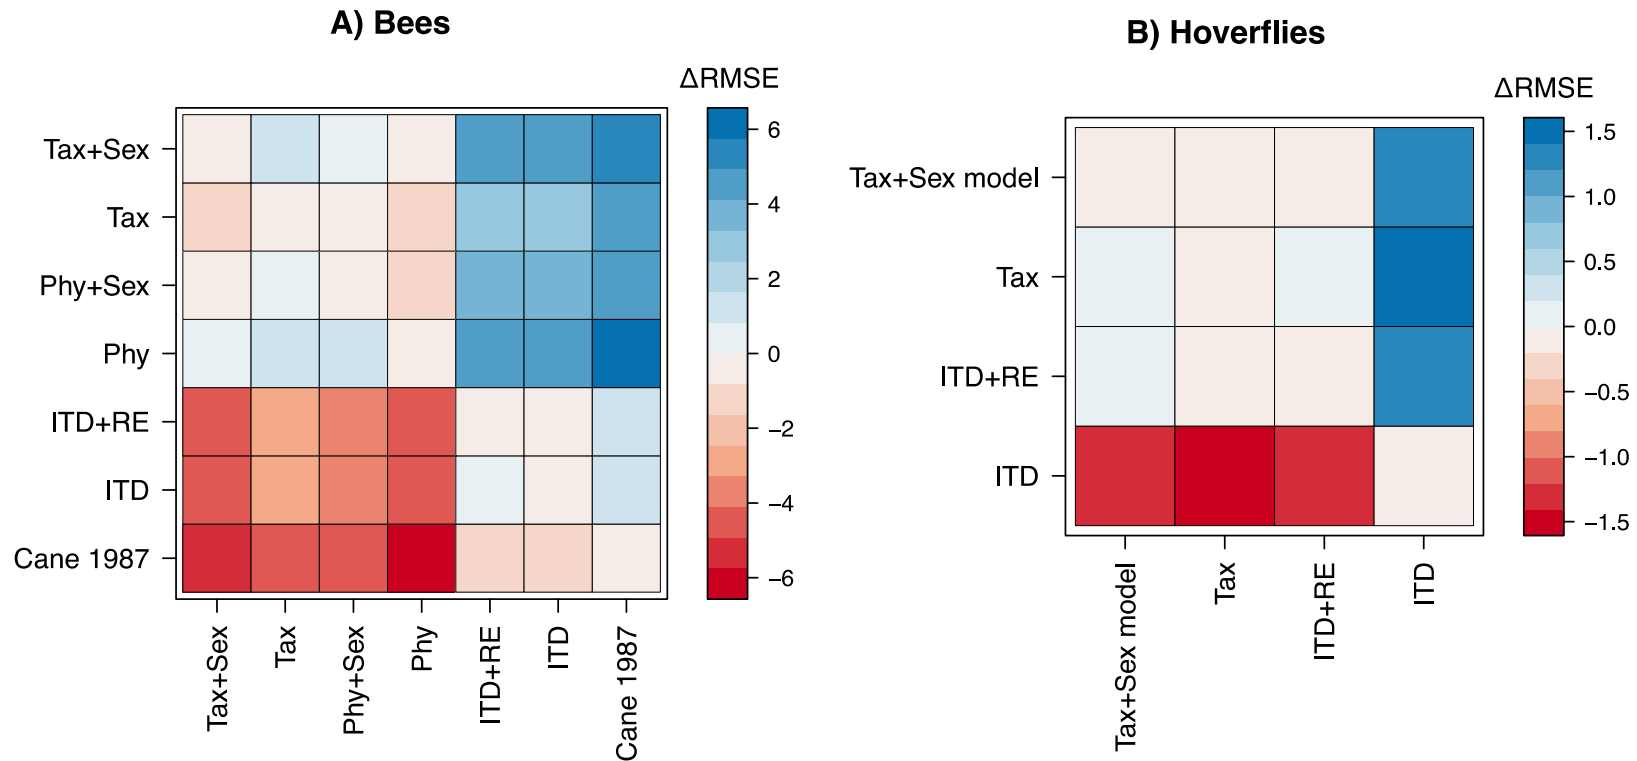

495

496

497 **Fig. 3.** Pairwise comparisons of  $\Delta$  root mean square error (RMSE) in milligrams between bee and hoverfly models. Negative values denote that  
 498 models on x axis have lower precision, whereas positive values signify higher precision. Tax+Sex: Full taxonomic model, Tax: Reduced taxonomic  
 499 model, Phy+Sex: Full phylogenetic model, Phy: Reduced phylogenetic model, ITD+RE: ITD mixed effect model, ITD: ITD fixed effect model.  
 500 Cane (1987)'s original model for bees.

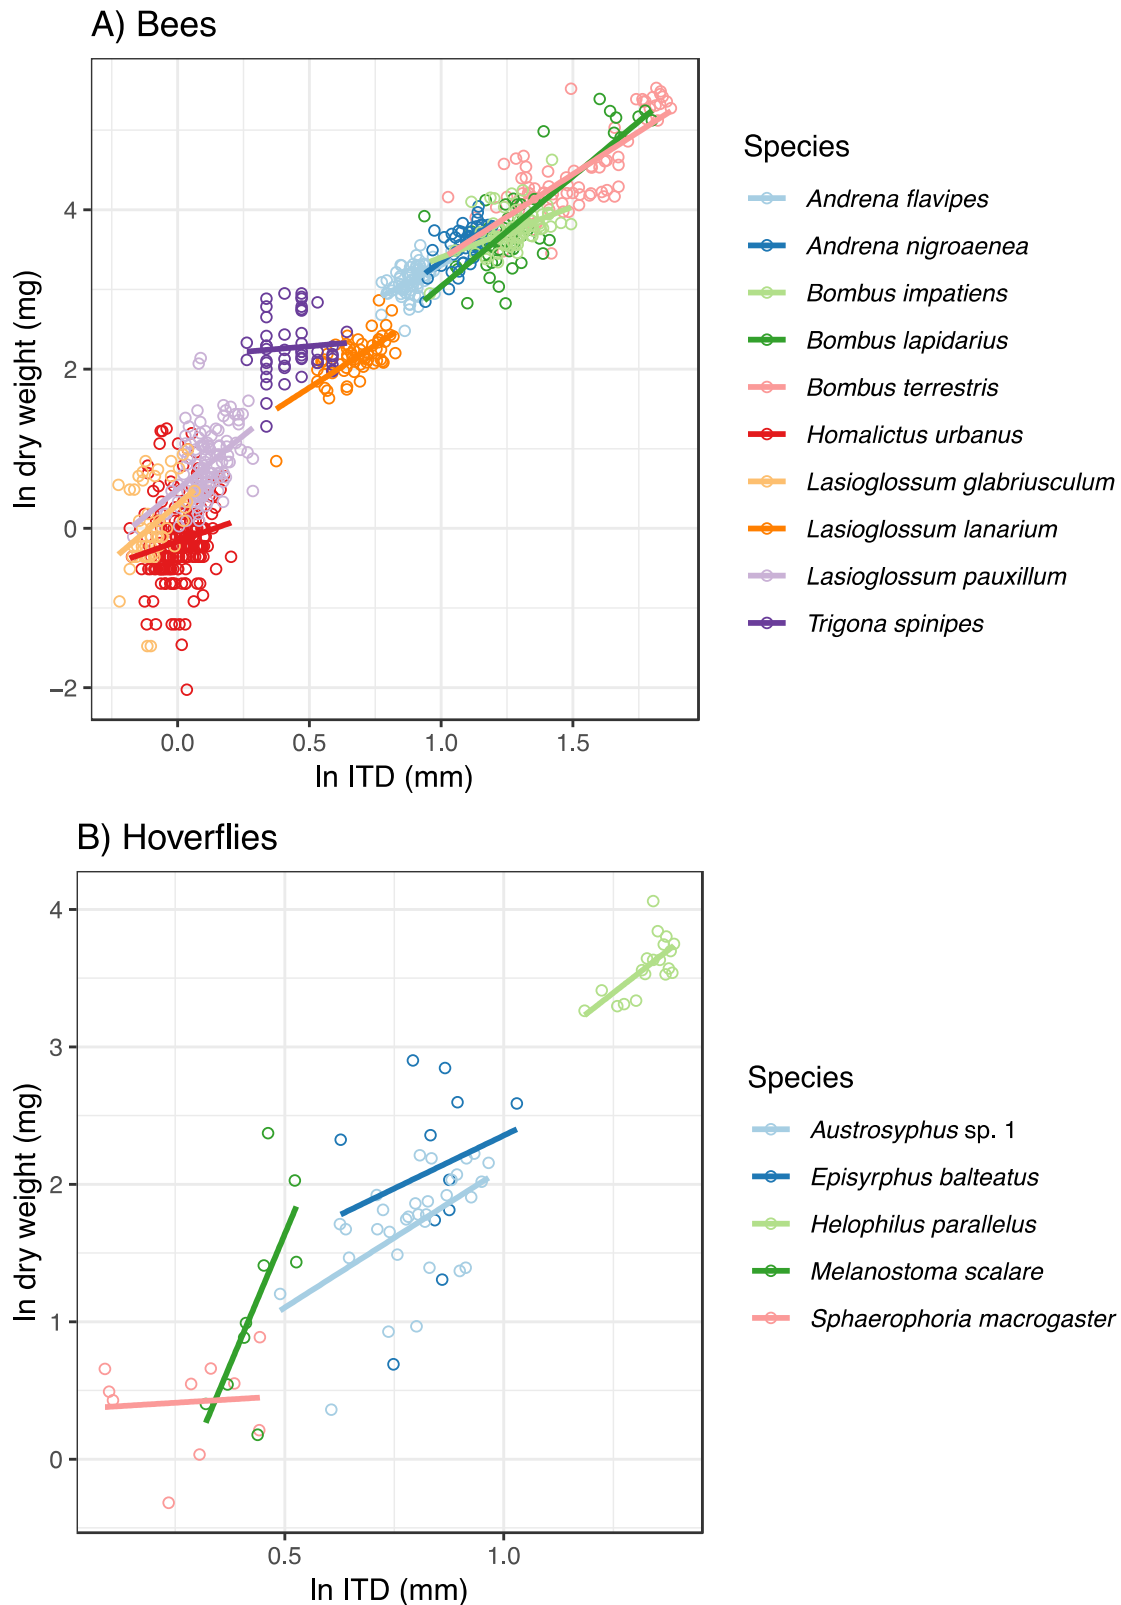

501

502 **Fig. 4.** Intraspecific predictions of female\* dry weight with intertegular distance (ITD)). Lines

503 denote line of best fit from OLS regression. \*Except for *Bombus impatiens*.

504

505 **References**

- 506 Angilletta Jr, M. J., T. D. Steury and M. W. Sears (2004). Temperature, growth rate, and body  
507 size in ectotherms: fitting pieces of a life-history puzzle. *Integrative and Comparative Biology*  
508 44(6): 498-509.
- 509 Ashton, K. (2004). Comparing phylogenetic signal in intraspecific and interspecific body size  
510 datasets. *Journal of Evolutionary Biology* 17(5): 1157-1161.
- 511 Bartomeus, I., D. Gravel, J. M. Tylianakis, M. A. Aizen, I. A. Dickie and M. Bernard-Verdier  
512 (2016). A common framework for identifying linkage rules across different types of  
513 interactions. *Functional Ecology* 30(12): 1894-1903.
- 514 Blomberg, S. P., T. Garland Jr and A. R. Ives (2003). Testing for phylogenetic signal in  
515 comparative data: behavioral traits are more labile. *Evolution* 57(4): 717-745.
- 516 Brady, C. J. and R. A. Noske (2006). Generalised regressions provide good estimates of insect  
517 and spider biomass in the monsoonal tropics of Australia. *Australian Journal of Entomology*  
518 45(3): 187-191.
- 519 Britton, T., B. Oxelman, A. Vinnersten and K. Bremer (2002). Phylogenetic dating with  
520 confidence intervals using mean path lengths. *Molecular Phylogenetics and Evolution* 24(1):  
521 58-65.
- 522 Brown, J. H., J. F. Gillooly, A. P. Allen, V. M. Savage and G. B. West (2004). Toward a  
523 metabolic theory of ecology. *Ecology* 85(7): 1771-1789.
- 524 Burgherr, P. and E. I. Meyer (1997). Regression analysis of linear body dimensions vs. dry  
525 mass in stream macroinvertebrates. *Archiv für Hydrobiologie* 139(1): 101-112.
- 526 Bürkner, P.-C. (2017). brms: An R package for Bayesian multilevel models using Stan. *Journal*  
527 *of Statistical Software* 80(1): 1-28.
- 528 Cane, J. H. (1987). Estimation of bee size using intertegular span (Apoidea). *Journal of Kansas*  
529 *Entomological Society* 60(1): 145-147.

530 Cariveau, D. P., G. K. Nayak, I. Bartomeus, J. Zientek, J. S. Ascher, J. Gibbs and R. Winfree  
531 (2016). The Allometry of Bee Proboscis Length and Its Uses in Ecology. *Plos One* 11(3).  
532 Chown, S. L. and K. J. Gaston (2010). Body size variation in insects: a macroecological  
533 perspective. *Biological Reviews* 85(1): 139-169.  
534 Davidowitz, G., L. J. D'Amico and H. F. Nijhout (2004). The effects of environmental  
535 variation on a mechanism that controls insect body size. *Evolutionary Ecology Research* 6(1):  
536 49-62.  
537 DeLong, J. P., B. Gilbert, J. B. Shurin, V. M. Savage, B. T. Barton, C. F. Clements, A. I. Dell,  
538 H. S. Greig, C. D. Harley and P. Kratina (2015). The body size dependence of trophic cascades.  
539 *The American Naturalist* 185(3): 354-366.  
540 Dietze, M. C., A. Fox, L. M. Beck-Johnson, J. L. Betancourt, M. B. Hooten, C. S. Jarnevich,  
541 T. H. Keitt, M. A. Kenney, C. M. Laney, L. G. Larsen, H. W. Loescher, C. K. Lunch, B. C.  
542 Pijanowski, J. T. Randerson, E. K. Read, A. T. Tredennick, R. Vargas, K. C. Weathers and E.  
543 P. White (2018). Iterative near-term ecological forecasting: Needs, opportunities, and  
544 challenges. *Proceedings of the National Academy of Sciences*. 201710231.  
545 Ehnes, R. B., B. C. Rall and U. Brose (2011). Phylogenetic grouping, curvature and metabolic  
546 scaling in terrestrial invertebrates. *Ecology Letters* 14(10): 993-1000.  
547 Francuski, L., I. Matic, J. Ludoški and V. Milankov (2011). Temporal patterns of genetic and  
548 phenotypic variation in the epidemiologically important drone fly, *Eristalis tenax*. *Medical and*  
549 *Veterinary Entomology* 25(2): 135-147.  
550 Gabry, J. and T. Mahr (2017). bayesplot: Plotting for Bayesian models. R package version 1.6  
551 Ganihar, S. R. (1997). Biomass estimates of terrestrial arthropods based on body length.  
552 *Journal of Bioscience* 22(2).  
553 Garibaldi, L. A., I. Bartomeus, R. Bommarco, A. M. Klein, S. A. Cunningham, M. A. Aizen,  
554 V. Boreux, M. P. Garratt, L. G. Carvalheiro and C. Kremen (2015). Trait matching of flower

555 visitors and crops predicts fruit set better than trait diversity. *Journal of Applied Ecology* 52(6):  
556 1436-1444.

557 Garland, J., Theodore and A. R. Ives (2000). Using the past to predict the present: confidence  
558 intervals for regression equations in phylogenetic comparative methods. *The American*  
559 *Naturalist* 155(3): 346-364.

560 Garland, T., A. F. Bennett and E. L. Rezende (2005). Phylogenetic approaches in comparative  
561 physiology. *Journal of experimental Biology* 208(16): 3015-3035.

562 Gelman, A., B. Goodrich, J. Gabry and I. Ali (2017). R-squared for Bayesian regression  
563 models. *Unpublished*. URL [http://www. stat. columbia. edu/~gelman/research/unpublished](http://www.stat.columbia.edu/~gelman/research/unpublished).  
564 [accessed 4 June 2018]

565 Gelman, A. and D. B. Rubin (1992). Inference from iterative simulation using multiple  
566 sequences. *Statistical Science* 7(4): 457-472.

567 Gould, S. J. (1966). Allometry and size in ontogeny and phylogeny. *Biological Reviews* 41(4):  
568 587-638.

569 Gowing, G. and H. F. Recher (1984). Length-wight relationships for invertebrates from forests  
570 in south-eastern New South Wales. *Austral Ecology* 9(1): 5-8.

571 Greenleaf, S. S., N. M. Williams, R. Winfree and C. Kremen (2007). Bee foraging ranges and  
572 their relationship to body size. *Oecologia* 153(3): 589-596.

573 Hadfield, J. D. (2010). MCMC methods for multi-response generalized linear mixed models:  
574 the MCMCglmm R package. *Journal of Statistical Software* 33(2): 1-22.

575 Hagen, M. and Y. L. Dupont (2013). Inter-tegular span and head width as estimators of fresh  
576 and dry body mass in bumblebees (*Bombus* spp.). *Insectes Sociaux* 60(2): 251-257.

577 Harris, D. J., S. D. Taylor and E. P. White (2018). Forecasting biodiversity in breeding birds  
578 using best practices. *PeerJ* 6:e4278.

579 Hedtke, S. M., S. Patiny and B. N. Danforth (2013). The bee tree of life: a supermatrix approach  
580 to apoid phylogeny and biogeography. *BMC Evolutionary Biology* 13(1): 138.

581 Henschel, J. R. and M. K. Seely (1997). Mass-length relationships of Namib Tenebrionids.  
582 *Madoqua* 19(2): 159-160.

583 Hodar, J. A. (1997). The use of regression equations for the estimation of prey length and  
584 biomass in diet studies of insectivore vertebrates. *Miscellanea Zoologica* 20(2): 1-10.

585 Inoue, T. (1992). *Inter-and interaspecific morphological variation in bumblebee species, and*  
586 *competition in flower utilization*. In: Effects of resource distribution on animal-plant  
587 interactions. Elsevier, New York. pp393-427

588 Johnson, M. D. and A. M. Strong (2000). Length-weight relationships of Jamaican arthropods.  
589 *Entomological News* 111(4): 270-281.

590 Karachle, P. K. and K. I. Stergiou (2012). *Morphometrics and allometry in fishes*. INTECH  
591 Open Access Publisher.

592 Kraus, F., S. Wolf and R. Moritz (2009). Male flight distance and population substructure in  
593 the bumblebee *Bombus terrestris*. *Journal of Animal Ecology* 78(1): 247-252.

594 Martin, C. A., R. Proulx, P. Magnan, C. Dytham and J. M. Lobo (2014). The biogeography of  
595 insects' length-dry mass relationships. *Insect Conservation and Diversity* 7(5): 413-419.

596 Martins, E. P. and E. A. Housworth (2002). Phylogeny shape and the phylogenetic comparative  
597 method. *Systematic biology* 51(6): 873-880.

598 Michener, C. D. (2000). *The bees of the world*, JHU press, Baltimore.

599 Mitchell, M., B. Muftakhidinov, T. Winchen, Z. Jędrzejewski-Szmek, T. G. Badger,  
600 badshah400 and A. Wilms. (2018). Engauge Digitizer Version 10.6. URL  
601 <http://markummittchell.github.io/engauge-digitizer> [accessed 17 January 2018]

602 Pagel, M. (1999). Inferring the historical patterns of biological evolution. *Nature* 401(6756):  
603 877.

- 604 Paradis, E., J. Claude and K. Strimmer (2004). APE: analyses of phylogenetics and evolution  
605 in R language. *Bioinformatics* 20(2): 289-290.
- 606 Ramalho, M., V. Imperatriz-Fonseca and T. Giannini (1998). Within-colony size variation of  
607 foragers and pollen load capacity in the stingless bee *Melipona quadrifasciata anthidioides*  
608 Lepeletier (Apidae, Hymenoptera). *Apidologie* 29: 221-228.
- 609 Revell, L. J. (2012). phytools: an R package for phylogenetic comparative biology (and other  
610 things). *Methods in Ecology and Evolution* 3(2): 217-223.
- 611 Rogers, L., R. Buschbom and C. Watson (1977). Length-weight relationships of shrub-steppe  
612 invertebrates. *Annals of the Entomological Society of America* 70(1): 51-53.
- 613 Rudolf, V. H. and N. L. Rasmussen (2013). Ontogenetic functional diversity: size structure of  
614 a keystone predator drives functioning of a complex ecosystem. *Ecology* 94(5): 1046-1056.
- 615 Sabo, J. L., J. L. Bastow and M. E. Power (2002). Length-mass relationships for adult aquatic  
616 and terrestrial invertebrates in a California watershed. *Journal of the North American*  
617 *Benthological Society* 21(2): 336-343.
- 618 Sage, R. D. (1982). Wet and dry-weight estimates of insects and spiders based on length. *The*  
619 *American Midland Naturalist* 108(2): 407-411.
- 620 Sample, B. E., R. J. Cooper, R. D. Greer and R. C. Whitmore (1993). Estimation of insect  
621 biomass by length and width. *The American Midland Naturalist* 129(2): 234-240.
- 622 Schoener, T. W. (1980). Length-weight regressions in tropical and temperate forest-understory  
623 insects. *Annals of the Entomological Society of America* 73(1): 106-109.
- 624 Schramski, J. R., A. I. Dell, J. M. Grady, R. M. Sibly and J. H. Brown (2015). Metabolic theory  
625 predicts whole-ecosystem properties. *Proceedings of the National Academy of Sciences* 112(8):  
626 2617-2622.
- 627 Shreeves, G. and J. Field (2008). Parental care and sexual size dimorphism in wasps and bees.  
628 *Behavioral Ecology and Sociobiology* 62(5): 843-852.

- 629 Speakman, J. R. (2005). Body size, energy metabolism and lifespan. *Journal of Experimental*  
630 *Biology* 208(9): 1717-1730.
- 631 Stang, M., P. G. Klinkhamer, N. M. Waser, I. Stang and E. van der Meijden (2009). Size-  
632 specific interaction patterns and size matching in a plant–pollinator interaction web. *Annals of*  
633 *Botany* 103(9): 1459-1469.
- 634 Stevens, V. M., A. Trochet, H. Van Dyck, J. Clobert and M. Baguette (2012). How is dispersal  
635 integrated in life histories: a quantitative analysis using butterflies. *Ecology Letters* 15(1): 74-  
636 86.
- 637 Stillwell, R. C., W. U. Blanckenhorn, T. Teder, G. Davidowitz and C. W. Fox (2010). Sex  
638 differences in phenotypic plasticity affect variation in sexual size dimorphism in insects: from  
639 physiology to evolution. *Annual Review of Entomology* 55.
- 640 Streinzer, M., W. Huber and J. Spaethe (2016). Body size limits dim-light foraging activity in  
641 stingless bees (Apidae: Meliponini). *Journal of Comparative Physiology A* 202: 643-655.
- 642 Team, R. C. (2018). R: A language and environment for statistical computing.
- 643 Teder, T., T. Tammaru and T. Esperk (2008). Dependence of phenotypic variance in body size  
644 on environmental quality. *The American Naturalist* 172(2): 223-232.
- 645 Thompson, F. C. and G. E. Rotheray (1998). *Family Syrphidae*. In: Manual of Palaearctic  
646 Diptera. L. Papp and B. Darvas. Budapest, Science Herald. pp1-139.
- 647 Trites, A. W. and D. Pauly (1998). Estimating mean body masses of marine mammals from  
648 maximum body lengths. *Canadian Journal of Zoology* 76(5): 886-896.
- 649 Van Nieuwstadt, M. and C. R. Iraheta (1996). Relation between size and foraging range in  
650 stingless bees (Apidae, Meliponinae). *Apidologie* 27(4): 219-228.
- 651 Vehtari, A., A. Gelman and J. Gabry (2017). Practical Bayesian model evaluation using leave-  
652 one-out cross-validation and WAIC. *Statistics and Computing* 27(5): 1413-1432.



- 653 Velghe, K. and I. Gregory-Eaves (2013). Body size is a significant predictor of congruency in  
654 species richness patterns: a meta-analysis of aquatic studies. *PloS one* 8(2): e57019.
- 655 Wardhaugh, C. W. (2013). Estimation of biomass from body length and width for tropical  
656 rainforest canopy invertebrates. *Australian Journal of Entomology* 52(4): 291-298.
- 657 White, E. P., S. M. Ernest, A. J. Kerkhoff and B. J. Enquist (2007). Relationships between body  
658 size and abundance in ecology. *Trends in Ecology & Evolution* 22(6): 323-330.
- 659 Woodward, G. and A. G. Hildrew (2002). Body-size determinants of niche overlap and  
660 intraguild predation within a complex food web. *Journal of Animal Ecology* 71(6): 1063-1074.

## 1 **Supporting Information**

2

### 3 *Description of pre-existing models*

4 In addition to developing new predictive allometric models for bees and hoverflies, we selected  
5 the three key pollinating insect orders: Diptera, Hymenoptera and Lepidoptera and collated all  
6 known predictive allometric models for those orders, regardless of whether they are  
7 acknowledged pollinators. Lepidoptera were not included in primary within-text analyses for  
8 logistic reasons and low abundances across sourced research projects. From an initial literature  
9 search, we obtained the publications analysed by Martin et al. (2014). We then reviewed each  
10 publication individually, including their references and citations for additional models.

11

12 Diptera: 26 predictive allometric models for Diptera were collated (Table S1A). Eleven models  
13 were reported for the entire order, including nine without any taxonomic breakdown of samples  
14 used. Twelve models were collated for the three main suborders Nematocera (6), Brachycera  
15 (4) and Cyclorapha (2) and two for specific families; Asilidae and Bombyliidae.

16

17 Hymenoptera: 38 predictive allometric models for Hymenoptera were collated (Table S1B).  
18 These included eight models for the entire order, ten for Formicidae and seven for all  
19 Hymenoptera excluding Formicidae. There are three models for Vespidae and two models for  
20 Apidae (Cane 1987 & Sabo et al. (2002). Sample et al's (1993) body length and body length \*  
21 body width models are provided for Braconidae, Ichneumonidae, Halictidae and Pompilidae.

22

23 Lepidoptera: 21 predictive allometric models for Lepidoptera were collated (Table S1C). This  
24 includes 13 with varying taxa and without lower classifications. Hodar (1997) provides specific  
25 models for Heterocera (moths) and Ropalocera (butterflies). Sample et al. (1993) provide body

26 length and body length \* body width models for Microlepidoptera and two moth families:

27 Geometridae and Arctiidae.

28

29

30 Table S1A. Allometric models for Diptera. Measure denotes trait measurement (BL = Body length, BW = Body width). Reg = regression type(L  
 31 = Linear regression. MA = Major axis regression or OLS = Ordinary Least Squares regression). Type denotes slope (EXP = exponential model,  
 32 PF = power function). Models are present in the form of  $y = \ln(\alpha) + \ln(\beta) * x$  unless Type noted with \*. \*\* = Included body width as well as  
 33 length.  
 34

| Source                    | Tax. grouping                | Sample size<br>(Families: species) | Biog. region | Measure | Range (mm) | Reg. | Type | Model             |                 |          |             |
|---------------------------|------------------------------|------------------------------------|--------------|---------|------------|------|------|-------------------|-----------------|----------|-------------|
|                           |                              |                                    |              |         |            |      |      | $\alpha \pm S.E.$ | $B \pm S.E.$    | Resi. SE | $R^2$       |
| Rogers et al. (1977)      | NA                           | (NA:84)                            | USA          | BL      | 0.9-34     | OLS  | PF   | -3.298 ± 0.115    | 2.366 ± 0.078   | 0.57     | <b>0.96</b> |
| Schoener (1980)           | NA                           | (NA:107)                           | Costa Rica   | BL      | NA         | OLS  | PF   | -2.603 ± 0.0688   | 1.64 ± 0.1224   | NA       | 0.80        |
| "                         | NA                           | (NA:124)                           | "            | "       | "          | "    | "    | -2.688 ± 0.051    | 1.59 ± 0.1173   | NA       | 0.78        |
| "                         | NA                           | (NA:171)                           | USA          | "       | "          | "    | "    | -3.816 ± 0.561    | 2.42 ± 0.0969   | NA       | 0.89        |
| Gowing and Recher (1984)  | NA                           | (NA:100)                           | Australia    | BL      | 2-11       | OLS  | PF   | 3.653 ± 0.129     | 2.546 ± 0.071   | 0.37     | <b>0.93</b> |
| Sample et al. (1993)      | Combined                     | (15:257)                           | USA          | BL      | 2.9-23.65  | OLS  | PF   | -3.184 ± 0.184    | 2.213 ± 0.085   | NA       | 0.85        |
| "                         | "                            | "                                  | "            | BL*BW   | "          | "    | "    | -2.197 ± 0.089    | 1.309 ± 0.03    | "        | <b>0.94</b> |
| "                         | BIB, SCI, TIP                | (3:46)                             | "            | BL      | 3.55-23.65 | "    | "    | -3.675 ± 0.23     | 2.212 ± 0.141   | "        | <b>0.92</b> |
| "                         | "                            | "                                  | "            | BL*BW   | "          | "    | "    | -2.217 ± 0.205    | 1.288 ± 0.071   | "        | <b>0.94</b> |
| "                         | ASI, DOL, EMP, RHA, STR, THE | (6:80)                             | "            | BL      | 2.9-17.99  | "    | "    | -3.374 ± 0.230    | 2.158 ± 0.101   | "        | <b>0.92</b> |
| "                         | "                            | "                                  | "            | BL*BW   | "          | "    | "    | -2.2 ± 0.147      | 1.259 ± 0.049   | "        | <b>0.95</b> |
| "                         | CAL, LAU, MUS, OTI, SYR, TAC | (6:119)                            | "            | BL      | 2.9-15.65  | "    | "    | -3.619 ± 0.212    | 2.632 ± 0.101   | "        | <b>0.92</b> |
| "                         | "                            | "                                  | "            | BL*BW   | "          | "    | "    | -2.02 ± 0.131     | 1.298 ± 0.042   | "        | <b>0.94</b> |
| Hodar (1997)              | BRA                          | (NA:26)                            | Spain        | HW      | NA         | OLS  | PF   | 0.655 ± 0.105     | 2.526 ± 0.139   | 0.47     | <b>0.93</b> |
| "                         | NEM                          | (NA:10)                            | "            | "       | NA         | "    | "    | 3.942 ± 0.259     | 3.106 ± 0.278   | 0.55     | <b>0.94</b> |
| Ganihar (1997)            | NA                           | (NA:20)                            | India        | BL      | NA         | OLS  | PF   | -3.4294 ± 0.01994 | 2.5943 ± 0.0334 | 0.03     | <b>0.99</b> |
| Johnson and Strong (2000) | NA                           | (NA:75)                            | Jamaica      | BL      | 1-12.5     | OLS  | PF   | -2.462 ± 0.196    | 1.881 ± 0.146   | NA       | 0.83        |
| "                         | NEM                          | (NA:21)                            | "            | "       | 1-4.8      | "    | "    | -2.562 ± 0.244    | 1.373 ± 0.207   | "        | 0.84        |
| "                         | NEM exc.                     | (NA:54)                            | "            | "       | 1.2-12.5   | "    | "    | -2.105 ± 0.178    | 1.805 ± 0.124   | "        | 0.89        |
| Sabo et al. (2002)        | BRA                          | NA                                 | USA          | BL      | NA         | OLS  | PF*  | 0.006 ± 0.007     | 3.05 ± 0.36     | NA       | 0.85        |
| "                         | NEM                          | NA                                 | "            | "       | "          | "    | "    | 0.1 ± 0.06        | 1.57 ± 0.2      | "        | <b>0.90</b> |
| "                         | ASI                          | (1:9)                              | "            | "       | "          | "    | "    | 0.38 ± 2.625      | 1.5 ± 2.469     | "        | 0.74        |
| "                         | BOM                          | (1:10)                             | "            | "       | "          | "    | "    | 0.007 ± 0.011     | 3.337 ± 0.676   | "        | <b>0.95</b> |
| Brady and Noske (2006)    | NA                           | (NA:9)                             | Australia    | BL      | 2-28       | OLS  | L*   | -0.041 ± 0.004    | 0.010 ± 0.001   | 0.02     | 0.84        |
| Wardhaugh (2013)          | NA                           | (NA:16)                            | Australia    | BL      | NA         | MA   | PF   | -3.29 ± 0.45      | 2.65 ± 0.36     | NA       | 0.72        |
| "                         | "                            | "                                  | "            | BL * BW | NA         | "    | "    | -1.91 ± 0.19      | 1.22 ± 0.11     | "        | 0.87        |

35 BIB =Bibionidae, SCI = Sciaridae, TIP = Tipulidae, ASI= Asilidae, BOM: Bombyliidae, DOL = Dolichopodidae, EMP = Empididae, RHA = Rhagionidae, STR = Stratiomyidae, THE = Therevidae, CAL = Calliphoridae,  
 36 LAU = Lauxaniidae, MUS = Muscidae, OTI = Otitidae, SYR = Syrphidae, TAC = Tachinidae. NEM = Nematocera, BRA= Brachycera, CYC = Cyclorrapha

37 Table S1B. Allometric models for Hymenoptera. Measure denotes trait measurement (BL = Body length, BW = Body width, ITD = Intertegular  
 38 distance). Reg = regression type (L = Linear regression. MA = Major axis regression or OLS = Ordinary Least Squares regression). Type denotes  
 39 slope (EXP = exponential model, PF = power function). Models are present in the form of  $y = \ln(\alpha) + \beta * \ln(x)$  unless Type noted with \*. \*\* =  
 40 Included body width as well as length.

| Source                    | Tax. grouping | Sample size<br>(Families: species) | Biog. region | Measure | Range (mm) | Reg. | Type | Model             |                 |          |             |
|---------------------------|---------------|------------------------------------|--------------|---------|------------|------|------|-------------------|-----------------|----------|-------------|
|                           |               |                                    |              |         |            |      |      | $\alpha \pm S.E.$ | $B \pm S.E.$    | Resi. SE | $R^2$       |
| Rogers et al. (1977)      | **            | (NA:97)                            | USA          | BL      | 0.7-27     | OLS  | PF   | -3.871 ± 0.108    | 2.407 ± 0.06    | 0.55     | <b>0.97</b> |
| “                         | FOR           | (NA:34)                            | “            | “       | 1.2-13.5   | OLS  | PF   | -4.029 ± 0.171    | 2.572 ± 0.097   | 0.4      | <b>0.98</b> |
| Cane (1987)               |               | (6:20)                             | USA          | ITD     | 1,6        | NL   | PF   | 0.6453 ± NA       | 2.4691 ± NA     | NA       | <b>0.96</b> |
| Schoener (1980)           | **            | (NA:174)                           | Costa Rica   | BL      | NA         | OLS  | PF*  | 0.043 ± 0.05      | 2.07 ± 0.091    | NA       | 0.87        |
| “                         | “             | (NA:122)                           | “            | “       | “          | “    | “    | 0.022 ± 0.056     | 2.29 ± 0.137    | “        | 0.84        |
| “                         | “             | (NA:82)                            | USA          | BL      | “          | “    | “    | 0.016 ± 0.072     | 2.55 ± 0.107    | “        | 0.94        |
| “                         | FOR           | (NA:25)                            | Costa Rica   | BL      | “          | “    | “    | 0.012 ± 0.113     | 2.72 ± 0.26     | “        | <b>0.91</b> |
| “                         | “             | (NA:20)                            | USA          | BL      | “          | “    | “    | 0.21 ± 0.127      | 2.31 ± 0.224    | “        | <b>0.93</b> |
| “                         | “             | (NA:13)                            | USA          | BL      | “          | “    | “    | 0.034 ± 0.155     | 2.19 ± 0.342    | “        | <b>0.91</b> |
| Gowing and Recher (1984)  | **            | (NA:86)                            | Australia    | BL      | 1-12       | OLS  | EXP  | -2.860 ± 0.099    | 0.478 ± 0.016   | 0.48     | <b>0.92</b> |
| “                         | FOR           | (NA:68)                            | “            | “       | 2-18       | OLS  | PF   | -3.306 ± 0.258    | 2.489 ± 0.051   | 0.32     | <b>0.97</b> |
| Sample et al. (1993)      | ALL           | (7:274)                            | USA          | BL      | 2.81-34.91 | OLS  | PF   | -4.284 ± 0.183    | 2.696 ± 0.083   | NA       | 0.89        |
| “                         | “             | “                                  | “            | BL * BW | “          | “    | “    | -2.375 ± 0.08     | 1.456 ± 0.028   | NA       | <b>0.95</b> |
| “                         | Ichneumonidae | (1: 106)                           | “            | BL      | 3.65-34.91 | “    | “    | -4.149 ± 0.262    | 2.464 ± 0.116   | NA       | <b>0.9</b>  |
| “                         | “             | “                                  | “            | BL * BW | “          | “    | “    | -2.497 ± 0.147    | 1.445 ± 0.053   | NA       | <b>0.94</b> |
| “                         | Braconidae    | (1:41)                             | “            | BL      | 2.81-15.42 | “    | “    | -3.854 ± 0.273    | 2.441 ± 0.147   | NA       | <b>0.94</b> |
| “                         | “             | “                                  | “            | BL * BW | “          | “    | “    | -2.19 ± 0.142     | 1.445 ± 0.069   | NA       | <b>0.96</b> |
| “                         | Vespidae      | (1:19)                             | “            | BL      | 8.14-20.58 | “    | “    | -3.540 ± 0.544    | 2.782 ± 0.195   | NA       | <b>0.96</b> |
| “                         | “             | “                                  | “            | BL * BW | “          | “    | “    | -1.537 ± 0.307    | 1.319 ± 0.07    | NA       | <b>0.98</b> |
| “                         | Formicidae    | (1:45)                             | “            | BL      | 3.62-17.41 | “    | “    | -4.727 ± 0.350    | 2.919 ± 0.11    | NA       | <b>0.93</b> |
| “                         | “             | “                                  | “            | BL * BW | “          | “    | “    | -2.378 ± 0.265    | 1.473 ± 0.106   | NA       | <b>0.9</b>  |
| “                         | Halictidae    | (1:21)                             | “            | BL      | 6-12.76    | “    | “    | -2.891 ± 0.386    | 2.302 ± 0.182   | NA       | <b>0.95</b> |
| “                         | “             | “                                  | “            | BL * BW | “          | “    | “    | -2.758 ± 0.357    | 1.590 ± 0.119   | NA       | <b>0.95</b> |
| “                         | Pompilidae    | (1:15)                             | “            | BL      | 5.55-14.32 | “    | “    | -2.341 ± 0.873    | 2.006 ± 0.396   | NA       | 0.81        |
| “                         | “             | “                                  | “            | BL * BW | “          | “    | “    | -1.946 ± 0.431    | 1.444 ± 0.154   | NA       | <b>0.93</b> |
| Hodar (1997)              | ALL           | NA                                 | Spain        | HW      | NA         | OLS  | PF*  | 1.999 ± 0.112     | 2.09 ± 0.132    | 0.51     | <b>0.92</b> |
| “                         | FOR – Workers | NA                                 | “            | “       | “          | “    | “    | 0.552 ± 0.068     | 2.550 ± 0.116   | 0.19     | <b>0.98</b> |
| “                         | FOR –Winged   | NA                                 | “            | “       | “          | “    | “    | 1.607 ± 0.127     | 2.752 ± 0.25    | 0.31     | <b>0.94</b> |
| Ganihar (1997)            | NA**          | (NA:26)                            | India        | BL      | NA         | OLS  | PF   | -3.5917 ± 0.1646  | 2.6429 ± 0.1127 | 0.24     | <b>0.94</b> |
| Johnson and Strong (2000) | ALL           | NA                                 | Jamaica      | BL      | 1.4-24.3   | OLS  | PF   | -3.556 ± 0.183    | 2.193 ± 0.110   | NA       | <b>0.92</b> |
| “                         | FOR           | NA                                 | “            | “       | 1.6-9.9    | “    | “    | -3.730 ± 0.298    | 2.103 ± 0.238   | “        | <b>0.9</b>  |
| “                         | “             | NA                                 | “            | “       | 1.4-24.3   | “    | “    | -3.295 ± 0.241    | 2.102 ± 0.132   | “        | <b>0.92</b> |
| Sabo et al. (2002)        | 7****         | (7:54)                             | USA          | BL      | NA         | OLS  | PF*  | 0.56 ± 0.64       | 1.56 ± 0.4      | NA       | 0.75        |
| “                         | API           | (1:10)                             | “            | “       | “          | “    | “    | 0.006 ± 0.041     | 3.407 ± 2.471   | “        | 0.81        |
| “                         | VES           | (1:19)                             | “            | “       | “          | “    | “    | 0.001 ± 0.002     | 3.723 ± 0.798   | “        | 0.95        |
| Brady and Noske (2006)    | FOR           | (NA:8)                             | Australia    | BL      | 2-10       | OLS  | PF*  | 0.001             | 2.330 ± 0.0151  | 0.49     | 0.71        |
| “                         | **            | (NA:9)                             | “            | BL      | 4-29       | OLS  | PF*  | 6.783 ± 0.001     | 2.544 ± 0.26    | 0.57     | 0.79        |
| Wardhaugh (2013)          | NA            | (NA:26)                            | Australia    | BL      | NA         | MA   | PF   | -4.3 ± 0.38       | 3 ± 0.24        | NA       | 0.83        |
| “                         | “             | “                                  | “            | BL * BW | “          | “    | “    | -2.1 ± 0.09       | 1.34 ± 0.05     | “        | <b>0.97</b> |

41 ANT = Anthophoridae, API = Apidae, CHR = Chrysididae, FOR = Formicidae, ICH = Ichneumonidae, SPH = Sphecidae, VES = Vespidae. \*\* = excluded ants. \*\*\*\*Seven families = ANT, API, CHR, FOR, ICH, SPH, VES

42 Table S1C. Allometric models for Lepidoptera. Measure denotes trait measurement (BL = Body length, BW = Body width). Reg = regression type  
 43 (MA = Major axis regression, OLS = Ordinary Least Squares regression). Type denotes slope (EXP = exponential model, PF = power function).  
 44 Models are present in the form of  $y = \ln(\alpha) + \ln(\beta) * x$  unless Type noted with \*. \*\* = Included body width as well as length.

| Source                    | Tax. grouping | Sample size<br>(Families: species) | Biog. region | Measure | Range (mm) | Reg. | Type | Model             |                |          |             |
|---------------------------|---------------|------------------------------------|--------------|---------|------------|------|------|-------------------|----------------|----------|-------------|
|                           |               |                                    |              |         |            |      |      | $\alpha \pm S.E.$ | $B \pm S.E.$   | Resi. SE | $R^2$       |
| Rogers et al. (1977)      | NA            | (NA:22)                            | USA          | BL      | 1.6-17     | OLS  | PF   | -4.037 ± 0.133    | 2.903 ± 0.08   | 0.31     | <b>0.99</b> |
| Sample et al. (1993)      | ALL           | (NA:384)                           | USA          | BL      | 2.76-40.73 | OLS  | PF   | -5.036 ± 0.157    | 3.122 ± 0.064  | NA       | <b>0.93</b> |
| "                         | "             | "                                  | "            | BL * BW | "          | "    | "    | -2.607 ± 0.088    | 1.457 ± 0.024  | "        | <b>0.95</b> |
| "                         | MIC.          | (NA:46)                            | "            | BL      | 2.76-10.6  | "    | "    | -4.913 ± 0.325    | 2.918 ± 0.169  | "        | <b>0.93</b> |
| "                         | "             | "                                  | "            | BL * BW | "          | "    | "    | -2.715 ± 0.199    | 1.395 ± 0.08   | "        | <b>0.93</b> |
| "                         | GEO           | (1:58)                             | "            | BL      | 6.45-21.70 | "    | "    | -4.172 ± 0.411    | 2.628 ± 0.167  | "        | <b>0.9</b>  |
| "                         | "             | "                                  | "            | BL * BW | "          | "    | "    | -2.343 ± 0.283    | 1.387 ± 0.084  | "        | <b>0.91</b> |
| "                         | ARC           | (1:60)                             | "            | BL      | 5.05-20.06 | "    | "    | -3.755 ± 0.242    | 2.658 ± 0.105  | "        | <b>0.96</b> |
| "                         | "             | "                                  | "            | BL * BW | "          | "    | "    | -1.658 ± 0.148    | 1.222 ± 0.044  | "        | <b>0.96</b> |
| Hodar (1996)              | HET           | (NA:10)                            | Spain        | HW      | NA         | OLS  | PF   | 2.053 ± 0.25      | 2.804 ± 0.236  | 0.49     | 0.95        |
| "                         | ROP           | (NA:10)                            | "            | HW      | NA         | "    | "    | 1.634 ± 0.46      | 2.793 ± 0.446  | 0.48     | 0.83        |
| Ganihar et al. (1997)     | NA            | (NA:10)                            | India        | BL      | NA         | OLS  | PF   | -4.7915 ± 0.751   | 2.8585 ± 0.257 | 0.46     | <b>0.93</b> |
| Johnson and Strong (2000) | NA            | (NA:40)                            | Jamaica      | BL      | 2.2-18.6   | OLS  | PF   | -3.268 ± 0.255    | 2.243 ± 0.130  | NA       | <b>0.94</b> |
| Schoener (1980)           | NA            | (NA:29)                            | Costa Rica   | BL      | NA         | OLS  | PF*  | 0.026 ± 0.186     | 2.55 ± 0.571   | NA       | <b>0.96</b> |
| "                         | "             | (NA:7)                             | "            | "       | "          | "    | "    | 0.078 ± 0.139     | 1.32 ± 0.683   | "        | 0.75        |
| "                         | "             | (NA:18)                            | USA          | "       | "          | "    | "    | 0.014 ± 0.18673   | 2.55 ± 0.571   | "        | 0.77        |
| Brady and Noske (2006)    | NA            | (NA:6)                             | Australia    | BL      | 7.34       | OLS  | PF*  | 0.001             | 2.313 ± 0.223  | 0.4      | 0.81        |
| Wardhaugh (2013)          | NA            | (NA:11)                            | Australia    | BL      | NA         | MA   | PF   | -3.83 ± 0.41      | 2.77 ± 0.27    | NA       | 0.83        |
| Wardhaugh (2013)          | "             | "                                  | "            | BL * BW | "          | "    | "    | -2.1 ± 0.21       | 1.37 ± 0.11    | "        | 0.88        |

45 HET = Heterocera, ROP = Ropalocera, MIC = Microlepidoptera, GEO = Geometridae, ARC = Arctiidae

46 Table S2. Predictive allometries for bee foraging distance. HW: Head width, IT: Intertegular  
47 distance.

| Source                                                                                         | Taxa                 | Distance measure         | Model                           |
|------------------------------------------------------------------------------------------------|----------------------|--------------------------|---------------------------------|
| Roubik and Aluja (1983) (in van Nieuwstadt & Iraheta (1996)<br>van Nieuwstadt & Iraheta (1996) | Apidae: Meliponini   | Artificial nectar source | $y = -579.1 + 550.9 * HW$       |
|                                                                                                |                      | Artificial nectar source | $y = -908.2 + 560.8 * HW$       |
| Greenleaf et al. (2007)                                                                        | Hymenoptera: Apoidea | Maximum                  | $y = -1.363 + 3.366 * \ln(ITD)$ |
|                                                                                                |                      | Typical                  | $y = -1.643 + 3.242 * \ln(ITD)$ |
|                                                                                                |                      | Feeder                   | $y = -0.760 + 2.313 * \ln(ITD)$ |
|                                                                                                |                      | Communication            | $y = -0.993 + 2.788 * \ln(ITD)$ |

48

49

50 Table S3. Distribution of included specimens. Numbers in parenthesis denote total specimens  
 51 and species per country, family and/or subfamily. Exact sampling locations are available in the  
 52 included dataset. ID: Specimen identifier. Either study author initials or full name and  
 53 affiliation. DL: Specimen deposition location. Numbers refer to author affiliations or institution  
 54 address is provided. \* All excluding Jim Cane's specimens (see Cane 1987).

| Tax a         | Region                | Country                              | Family                                                       | Subfamily                                                                                          | ID                                      | DL            |
|---------------|-----------------------|--------------------------------------|--------------------------------------------------------------|----------------------------------------------------------------------------------------------------|-----------------------------------------|---------------|
| Bee           | Australasia           | Australia (899, 93)                  | Apidae (185, 20)                                             | Apinae (125, 13), Xylocopinae (60, 7)                                                              | LKK & MH                                | UNER;<br>MHPC |
|               |                       |                                      | Colletidae (130, 15)                                         | Colletinae (76, 7), Euryglossinae (49, 3)                                                          |                                         |               |
|               |                       |                                      | Halictidae (519, 38)                                         | Halictinae (441, 25)                                                                               |                                         |               |
|               |                       |                                      | Megachilidae                                                 | Nomiinae (78, 13)<br>Megachilinae (65, 20)                                                         |                                         |               |
|               | Europe                | Belgium (703, 49)                    | Andrenidae                                                   | Andreninae (253, 15)                                                                               | NJV, SPMR &<br>Alain Pauly <sup>A</sup> | ULBC          |
|               |                       |                                      | Apidae (242)                                                 | Apinae (192, 9), Nomadinae (50, 4)                                                                 |                                         |               |
|               |                       |                                      | Halictidae                                                   | Halictinae (120, 9)                                                                                |                                         |               |
|               |                       |                                      | Megachilidae                                                 | Megachilinae (74, 9)                                                                               |                                         |               |
|               |                       |                                      | Melittidae (14)                                              | Dasypodainae (3, 1), Melittinae (11, 2)                                                            |                                         |               |
|               |                       | Germany (765, 63)                    | Andrenidae                                                   | Andreninae (197, 14)                                                                               | Klaus Mandery <sup>B</sup>              | KMIB          |
|               |                       | Apidae (189, 12)                     | Apinae (188, 11), Nomadinae (1, 1)                           |                                                                                                    |                                         |               |
|               |                       | Colletidae                           | Hylaeinae (13, 6)                                            |                                                                                                    |                                         |               |
|               |                       | Halictidae                           | Halictinae (337, 18)                                         |                                                                                                    |                                         |               |
|               |                       | Megachilidae                         | Megachilinae (29, 13)                                        |                                                                                                    |                                         |               |
|               | Ireland (52, 15)      | Andrenidae                           | Andreninae (4, 2)                                            | LR                                                                                                 | TCDS                                    |               |
|               |                       | Apidae                               | Apinae (29, 6)                                               |                                                                                                    |                                         |               |
|               |                       | Colletidae                           | Hylaeinae (5, 2)                                             |                                                                                                    |                                         |               |
|               |                       | Halictidae                           | Halictinae (14, 5)                                           |                                                                                                    |                                         |               |
|               | Spain (74, 46)        | Andrenidae (18, 13)                  | Andreninae (10, 8), Panurginae (8, 5)                        | FPM & Oscar<br>Aguado <sup>H</sup>                                                                 | EBDS                                    |               |
|               |                       | Apidae (27, 17)                      | Apinae (16, 10), Nomadinae (6, 4)                            |                                                                                                    |                                         |               |
|               |                       | Colletidae                           | Xylocopinae (5, 3)<br>Colletinae (4, 2)                      |                                                                                                    |                                         |               |
|               |                       | Halictidae (11, 6)                   | Halictinae (8, 5), Rophitinae (3, 1)                         |                                                                                                    |                                         |               |
|               |                       | Megachilidae                         | Megachilinae (7, 6)                                          |                                                                                                    |                                         |               |
|               |                       | Melittidae                           | Dasypodainae (7, 2)                                          |                                                                                                    |                                         |               |
|               | Switzerland (210, 63) | Andrenidae                           | Andreninae (54, 14)                                          | Sonja Gerber <sup>C</sup> ,<br>Michael<br>Herrmann <sup>D</sup> and<br>Andreas Müller <sup>E</sup> | AGZS                                    |               |
|               |                       | Apidae (60, 20)                      | Apinae (54, 16), Nomadinae (4, 3),<br>Xylocopinae (2, 1)     |                                                                                                    |                                         |               |
|               |                       | Colletidae                           | Colletinae (3, 1)                                            |                                                                                                    |                                         |               |
|               |                       | Halictidae                           | Halictinae (76, 20)                                          |                                                                                                    |                                         |               |
|               |                       | Megachilidae                         | Megachilinae (15, 6)                                         |                                                                                                    |                                         |               |
|               |                       | Melittidae                           | Melittinae (2, 2)                                            |                                                                                                    |                                         |               |
|               | UK (46, 4)            | Apidae                               | Apinae (46, 4)                                               | JMM                                                                                                | UNER                                    |               |
| North America | USA (1082, 132)       | Andrenidae (155, 35)                 | Andreninae (150, 30), Oxaeinae (1, 1),<br>Panurginae (4, 4)  | ZMP,<br>Cane<br>(1987)                                                                             | UMSP,*                                  |               |
|               |                       | Apidae (378, 27)                     | Apinae (195, 18), Nomadinae (17, 4),<br>Xylocopinae (166, 4) |                                                                                                    |                                         |               |
|               |                       | Colletidae (86, 8)                   | Colletinae (3, 2), Hylaeinae (83, 6)                         |                                                                                                    |                                         |               |
|               |                       | Halictidae (396, 44)                 | Halictinae (241, 42), Nomiinae (1, 1),<br>Rophitinae (1, 1)  |                                                                                                    |                                         |               |
|               |                       | Megachilidae (17)                    | Megachilinae (67, 17)                                        |                                                                                                    |                                         |               |
|               |                       | Melittidae (1)                       | Dasypodainae (1, 1)                                          |                                                                                                    |                                         |               |
| South America | Brazil (204, 22)      | Andrenidae                           | Panurginae (8, 1)                                            | BMF, JSP                                                                                           | UCFB                                    |               |
|               |                       | Apidae (174, 17)                     | Apinae (149, 12), Xylocopinae (25, 5)                        |                                                                                                    |                                         |               |
|               |                       | Halictidae                           | Halictinae (11, 2)                                           |                                                                                                    |                                         |               |
|               |                       | Megachilidae                         | Megachilinae (11, 2)                                         |                                                                                                    |                                         |               |
| Honey fly     | Australasia           | Australia (120, 19)                  |                                                              | Eristalinae (25, 7), Syrphinae (95, 12)                                                            | Susan Wright <sup>F</sup>               | UNER          |
|               |                       |                                      |                                                              |                                                                                                    |                                         |               |
|               |                       |                                      | Europe                                                       | Ireland (39, 15)                                                                                   | Eristalinae (8, 5), Syrphinae (31, 10)  | LR            |
|               | Spain (8, 8)          | Eristalinae (6, 6), Syrphinae (2, 2) | FPM & Oscar<br>Aguado                                        | EBDS                                                                                               |                                         |               |
|               | Switzerland (232, 79) |                                      | Eristalinae (114, 37), Syrphinae (118, 42)                   | Ruth Bärffuss <sup>G</sup>                                                                         | AGZS                                    |               |



56 *Taxonomist affiliations:* **A:** Institut royal des Sciences naturelles de Belgique, O.D. Taxonomie  
57 & Phylogénie, Rue Vautier 29, 1000 Bruxelles, Belgium. **B:** Institut für  
58 Biodiversitätsinformation e.V. Geschwister-Scholl-Str. 6 96106 Ebern, Germany. **C:** Drosera  
59 Ecologie Appliquée SA Chemin de la Poudrière 36 1950 Sion Switzerland. **D:** WAB-  
60 Mauerbienenzucht Sonnentauweg 47 78467 Konstanz Germany. **E:** Natur Umwelt Wissen  
61 GmbH Bergstrasse 162 8032 Zürich Switzerland. **F:** Queensland Museum, PO Box 3300,  
62 South Brisbane BC, Queensland 4101, Australia. **G:** Ruth Bärffuss Feldstrasse 7 8625 Gossau  
63 ZH Switzerland. **H:** Freelance/no affiliation.

64

65 *Specimen deposition locations:* **AGZS:** Agroscope, Agroecology and Environment, Zürich,  
66 Switzerland. **EBDS:** Estación Biológica de Doñana Collection, Sevilla, Spain. **KMIB:** Klaus  
67 Mandery's collection, Institut für Biodiversitätsinformation, Bern, Germany. **MHPC:** Mark  
68 Hall's personal collection, Australia. **TCDS:** Stout Lab, Trinity College, Dublin, Ireland.  
69 **UCFB:** Bee Laboratory Collection, Federal University of Ceará, Fortaleza, Brazil. **ULBC:**  
70 Agroecology Lab reference collection, Université libre de Bruxelles (ULB), Belgium. **UMSP:**  
71 University of Minnesota Insect Collection, USA. **UNER:** Rader Lab Insect Collection,  
72 University of New England, Armidale, Australia.

73

#### 74 **Taxonomic resources used within this study for identifying insect specimens**

78

79 Amiet, F., Herrmann, M., Müller, A. & Neumayer, R. (1996) *Insecta Helvetica Fauna 12,*  
80 *Hymenoptera Apidae 1-9.* Schweizerische Entomologische Gesellschaft, Neuchatel,  
81 Switzerland.

- 82 Ascher, J. S. & Pickering, J. (2018) Discover Life bee species guide and world checklist  
83 (Hymenoptera: Apoidea: Anthophila). URL  
84 [http://www.discoverlife.org/mp/20q?guide=Apoidea\\_species](http://www.discoverlife.org/mp/20q?guide=Apoidea_species) [Accessed 7 June 2018]  
85 Atlas of Hymenoptera. URL [http://www.atlashymenoptera.net/liste\\_them.asp?them=Belgium](http://www.atlashymenoptera.net/liste_them.asp?them=Belgium)  
86 [accessed 20 January 2017]  
87 Baker, J. R. (1975) Taxonomy of five nearctic subgenera of *Coelioxys* (Hymenoptera:  
88 Megachilidae). *University of Kansas Science Bulletin*, 50, 649–730.  
89 Ball, S. & Morris, R. (2015) *Britain's Hoverflies: A Field Guide-Revised and Updated*  
90 *Second Edition*. Princeton University Press, Princeton.  
91 Batley, M. & Houston, T.F. (2012) Revision of the Australian bee genus *Trichocolletes*  
92 Cockerell (Hymenoptera: Colletidae: Paracolletini). *Records of the Australian Museum*, 64,  
93 1-50.  
94 Bouseman, J. K. & LaBerge, W. E. (1978) A revision of the bees of the genus *Andrena* of the  
95 Western Hemisphere. Part IX. Subgenus *Melandrena*. *Transactions of the American*  
96 *Entomological Society*, 104, 275–389.  
97 Coelho, B. W. T. (2004) A review of the bee genus *Augochlorella* (Hymenoptera: Halictidae:  
98 Augochlorini). *Systematic Entomology* 29, 282–323.  
99 Dollin, A.E. and Dollin, L.J. (1997) Australian stingless bees of the genus *Trigona*  
100 (Hymenoptera: Apidae). *Invertebrate Systematics*, 11(6), 861-896.  
101 Dollin, A.E., Dollin, L.J. & Rasmussen, C. (2015) Australian and New Guinean stingless  
102 bees of the genus *Austroplebeia* Moure (Hymenoptera: Apidae)—a revision. *Zootaxa*,  
103 4047(1), 1-073.  
104 Falk, S. J. (2015) *Field guide to the bees of Great Britain and Ireland*. British Wildlife  
105 Publishing, UK.

- 106 Gibbs, J. (2011) Revision of the metallic *Lasioglossum* (Dialictus) of eastern North America  
107 (Hymenoptera: Halictidae: Halictini). *Zootaxa* 3073, 1–216.
- 108 Gibbs, J., Packer, L., Dumes, S. & Danforth, B. (2013) Revision and reclassification of  
109 *Lasioglossum* (Evylaeus), L. (Hemihalictus) and L. (Sphecodogastra) in eastern North  
110 America (Hymenoptera: Apoidea: Halictidae). *Zootaxa* 3672, 1–117.
- 111 Gonzalez, V.H., Engel, M.S. & Griswold, T.L. (2013) The lithurgine bees of Australia  
112 (Hymenoptera: Megachilidae), with a note on *Megachile rotundipennis*. *Journal of*  
113 *Melittology*, (11), 1-19.
- 114 Houston, T.F. (1975) A revision of the Australian hylaeine bees (Hymenoptera: Colletidae).  
115 I. Introductory material and the genera *Heterapoides* Sandhouse, *Gephyrohylaeus* Michener,  
116 *Huleoides* Smith, *Pharohylaeus* Michener, *Hemirhiza* Michener, *Amphylaeus* Michener and  
117 *Meroglossa* Smith. *Australian Journal of Zoology Supplementary Series*, 23(36), 1-135.
- 118 Houston, T.F. (1981) A revision of the Australian hylaeine bees (Hymenoptera: Colletidae).  
119 II. *Australian Journal of Zoology Supplementary Series*, 29(80), 1-128.
- 120 Laberge, W. E. (1967) A revision of the bees of the genus *Andrena* of the Western  
121 Hemisphere. Part I Callandrena. (Hymenoptera: Andrenidae ). *Bulletin of the University of*  
122 *Nebraska State Museum* 7, 1–316.
- 123 LaBerge, W. E. (1973) A revision of the bees of the genus *Andrena* of the Western  
124 Hemisphere. Part VI. Subgenus Trachandrena. *Transactions of the American Entomological*  
125 *Society* 99, 235–371.
- 126 Lavery, T. M. & Harder, L. D. (1988) The bumblebees of eastern Canada. *The Canadian*  
127 *Entomologist* 120, 965–987.
- 128

- 129 Leijs, R., Batley, M. & Hogendoorn, K. (2017) The genus *Amegilla* (Hymenoptera, Apidae,  
130 Anthophorini) in Australia: A revision of the subgenera *Notomegilla* and *Zonamegilla*.  
131 *ZooKeys*, (653), 79.
- 132 Maibach, A. Goeldlin de Tiefenau, P. & Dirickx, H. G.(1992) *Liste Faunistique des*  
133 *Syrphidae de Suisse (Diptera)*. *Miscellanea Faunistica Helvetiae* 1.
- 134 Mauss. V. (1994) Bestimmungsschlüssel für die Hummeln der Bundesrepublik Deutschland.  
135 – 5. Aufl. pp. 1-50. Deutscher Jugendbund für Naturbeobachtung, Hamburg.
- 136 Maynard, G.V. (2014) Revision of *Goniocolletes* and seven Australian subgenera of  
137 *Leioproctus* (Hymenoptera: Apoidea: Colletidae), and description of new taxa. *Zootaxa*,  
138 3715, 1-114.
- 139 McGinley, R. J. (1986) *Studies of Halictinae (Apoidea: Halictidae), I: Revision of new world*  
140 *Lasioglossum Curtis*. *Smithsonian Contributions to Zoology* 429, 1–294.
- 141 Michener, C.D. (1965) A classification of the bees of the Australian and South Pacific  
142 regions. *Bulletin of the American Museum of Natural History*; v. 130.
- 143 Michener, C.D. (2007) *The bees of the world*, 2nd edn. Johns Hopkins University Press,  
144 Baltimore.
- 145 Miller, S. R., Gaebel, R., Mitchell, R.J. & Arduser M (2002) Occurrence of two species of  
146 old world bees, *Anthidium manicatum* and *A. oblongatum* (Apoidea: Megachilidae), in  
147 northern Ohio and southern Michigan. *Great Lakes Entomologist* 35, 65–69.
- 148 Mitchell, T. B. (1960) Bees of the eastern United States. I. *Technical bulletin (North*  
149 *Carolina Agricultural Experiment Station)*, 141, 1-538.
- 150 Mitchell, T.B. (1962) Bees of the eastern United States. II. *Technical bulletin (North*  
151 *Carolina Agricultural Experiment Station)*, 152, 1-557.
- 152 PaDIL: Australian pollinator database (2018): URL <http://www.padil.gov.au> [accessed 10  
153 [November 2017](#)]
- 154

- 155 Ortiz-Sánchez, F. J. & Gallego, C. O. (2004) *Fauna ibérica. Vol. 23. Hymenoptera: Apoidea*  
156 *I. Consejo Superior de Investigaciones Científicas (CSIC), Spain.*
- 157 Patiny, S. & Terzo, M. (2010) *Catalogue et clé des sous-genres et espèces du genre Andrena*  
158 *de Belgique et du nord de la France (Hymenoptera, Apoidea). Université de Mons. Belgium.*
- 159 Prys-Jones, O. E. & Corbet, S. A. (2011). *Bumblebees*. 3<sup>rd</sup> edn. Pelagic Publishing, UK.
- 160 Rehan, S. M. & Sheffield, C. S. (2011) Morphological and molecular delineation of a new  
161 species in the *Ceratina dupla* species-group (Hymenoptera: Apidae: Xylocopinae) of eastern  
162 North America. *Zootaxa* 50, 35–50.
- 163 Reyes, S.G. (1993) Revision of the bee genus *Braunsapis* in the Australian region  
164 (Hymenoptera: Xylocopinae: Allodapini). *The University of Kansas science bulletin*, 55, 97-  
165 121
- 166 Roberts, R. B. (1972) Revision of the bee genus *Agapostemon* (Hymenoptera: Halictidae).  
167 *University of Kansas Science Bulletin* 49, 437–590.
- 168 Roberts, R. B. (1973) Bees of northwestern America: *Halictus* (Hymenoptera: Halictidae).  
169 *Agricultural Experimental Station: Oregon State Technical Bulletin* 126, 23.
- 170 Röder, G. (1990) *Biologie der Schwebfliegen Deutschlands (Diptera: Syrphidae)*. Erna Bauer  
171 Verlag, D-7538 Keltern-Weiler.
- 172 Scheuchl, E. (2000) *Illustrierte Bestimmungstabellen der Wildbienen Deutschlands und*  
173 *Österreichs. Band I: Anthophoridae. 2., erweiterte Auflage*. Eigenverlag.
- 174 Scheuchl, E. (2000) *Illustrierte Bestimmungstabellen der Wildbienen Deutschlands und*  
175 *Österreichs. Band II: Megachilidae – Melittidae*. Eigenverlag.
- 176 Schmid-Egger, C. & Scheuchl, E. (1997) *Illustrierte Bestimmungstabellen der Wildbienen*  
177 *Deutschlands und Österreichs. Band III: Andrenidae*. Eigenverlag.

- 178 Sheffield, C.S., Ratti, C., Packer, L. & Griswold, T. (2011) Leafcutter and mason bees of the  
179 genus *Megachile* Latreille (Hymenoptera: Megachilidae) in Canada and Alaska. *Canadian*  
180 *Journal of Arthropod Identification* 18, 1–107.
- 181 Silveira, F.A., Melo, G. A. & Almeida, E. A. B. (2002) Abelhas Brasileiras: Sistemática e  
182 identificação. 1 edição. edição do autor, Belo Horizonte.
- 183 Snelling, R. R. (1970) Studies on North American bees of the genus *Hylaeus*. 5. The  
184 subgenera *Hylaeus*, *S. Str.* and *Paraprosopis* (Hymenoptera: Colletidae). *Contributions in*  
185 *Science-Los Angeles County Museum* 180, 1–59.
- 186 Stubbs, A. E. & Falk, S. J. (1983) *British hoverflies. An illustrated identification guide.*  
187 British Entomological and Natural History Society, UK.
- 188 Terzo, M., Iserbyt, S. & Rasmont, P. (2007) Révision des Xylocopinae (Hymenoptera :  
189 Apidae) de France et de Belgique. *Annales de la Société entomologique de France (N.S.)*,  
190 43:4, 445-491
- 191 Thompson, F. C. (2011) Australian flower flies (Diptera:Syrphidae): A taxonomic  
192 conspectus. Unpublished.
- 193 Walker, K.L. (1986) Revision of the Australian species of the genus *Homalictus* Cockerell  
194 (Hymenoptera: Halictidae). *Memoirs of the Museum of Victoria*, 47(2), 105-200.
- 195 Walker, K.L. (1995) Revision of the Australian native bee subgenus *Lasioglossum*  
196 (*Chilalictus*) (Hymenoptera: Halictidae). *Memoirs of the Museum of Victoria*, 55(2), 215 –  
197 423.
- 198 Warncke, K. (1992): Die westpaläarktischen Arten der Bienengattung *Sphecodes* LATR.  
199 (Hymenoptera, Apidae, Halictinae). *Bericht Naturforschende Gesellschaft Augsburg* 52, 9-  
200 64.  
201  
202

203 Table S4A. Bees: Model parameters of best-fitting taxonomic GLMM and phylogenetic  
 204 GLMM. Post.: Posterior mean estimate (95% credible intervals). ESS: Effective sample size.  
 205 Taxo-GLMM model formula:  $\ln \text{Dry weight} \sim \ln \text{ITD} + \text{Family} + \text{Family}:\ln(\text{ITD}) + \text{Sex} +$   
 206  $\text{Sex}:\ln(\text{ITD}) + (1|\text{Region}/\text{Species})$ . Phylo-GLMM formula:  $\ln \text{Dry weight} \sim \ln \text{ITD} + \text{Sex} +$   
 207  $\text{Sex}:\ln(\text{ITD}) + (1|\text{Region}/\text{Species})$ .

| Effect type    | Taxo. GLMM         |                    |                       | Phylo. GLMM        |                       |      |
|----------------|--------------------|--------------------|-----------------------|--------------------|-----------------------|------|
|                | Parameters         | Post.              | ESS                   | Post.              | ESS                   |      |
| Fixed          | Intercept          | 1.05 (0.64 – 1.37) | 873                   | 0.81 (0.32 – 1.25) | 660                   |      |
|                | lnITD              | 2.09 (2.00 – 2.19) | 893                   | 2.03 (1.94 – 2.11) | 1888                  |      |
|                | Sex                | Male               | -0.1 (-0.15 – -0.05)  | 2552               | -0.13 (-0.17 – -0.08) | 3020 |
|                |                    | Male:lnITD         | -0.15 (-0.21 – -0.09) | 3069               | -0.14 (-0.2 – -0.08)  | 3263 |
|                | Family             | Andrenidae         | -0.08 (-0.27 – 0.10)  | 879                | NA                    | NA   |
|                |                    | Colletidae         | -0.33 (-0.52 – -0.13) | 629                | NA                    | NA   |
|                |                    | Halictidae         | -0.35 (-0.49 – -0.21) | 632                | NA                    | NA   |
|                |                    | Megachilidae       | -0.17 (-0.40 – 0.05)  | 1024               | NA                    | NA   |
|                |                    | Melittidae         | -0.47 (-0.97 – 0.03)  | 2548               | NA                    | NA   |
|                |                    | Andrenidae:lnITD   | 0.10 (-0.09 – 0.28)   | 1265               | NA                    | NA   |
|                |                    | Colletidae:lnITD   | -0.14 (-0.44 – -0.13) | 1330               | NA                    | NA   |
|                |                    | Halictidae:lnITD   | 0.02 (-0.15 – -0.18)  | 1195               | NA                    | NA   |
|                | Megachilidae:lnITD | D                  | 0.02 (-0.22 – 0.26)   | 1135               | NA                    | NA   |
|                |                    |                    | -0.01 (-0.21 – -0.09) | 2688               | NA                    | NA   |
|                | Random             | Region             | 0.29 (0.11 – 0.65)    | 1702               | 0.27 (0.1 – 0.64)     | 1752 |
| Region:Species |                    | 0.30 (0.27 – 0.33) | 871                   | 0.59 (0.52 – 0.66) | 977                   |      |
| Sigma          |                    | 0.33 (0.32 – 0.34) | 4000                  | 0.33 (0.32 – 0.34) | 4000                  |      |

208

209

210 Table S4B. Hoverflies: Posterior mean model parameters for best-fitting taxonomic GLMM.  
 211 Post.: Posterior mean estimate (95% confidence intervals). ESS: Effective sample size.  
 212 Model formula:  $\ln \text{ dry weight} \sim \ln \text{ ITD} + \text{Sex} + \text{Subfamily} + \text{Sex}:\ln \text{ITD} + \text{Subfamily}:\ln \text{ITD} +$   
 213  $(1|\text{Region}/\text{Species})$ .

| <i>Taxo.</i> GLMM |                  |                             |                      |      |
|-------------------|------------------|-----------------------------|----------------------|------|
| Effect type       |                  | Post.                       | ESS                  |      |
| Fixed             | Intercept        | -0.13 (-0.92 – 0.37)        | 1287                 |      |
|                   | $\ln \text{ITD}$ | 2.50 (2.23 – 2.76)          | 2462                 |      |
|                   | Sex              | Male                        | -0.09 (-0.33 – 0.14) | 2811 |
|                   |                  | Male: $\ln \text{ITD}$      | -0.11 (-0.36 – 0.15) | 2885 |
|                   | Subfamily        | Syrphinae                   | -0.02 (-0.35 – 0.31) | 2349 |
|                   |                  | Syrphinae: $\ln \text{ITD}$ | -0.16 (-0.48 – 0.18) | 2037 |
| Random            | Region           | 0.31 (0.06 – 0.81)          | 1664                 |      |
|                   | Region:Species   | 0.2 (0.12 – 0.28)           | 1357                 |      |
|                   | Sigma            | 0.44 (0.41 – 0.48)          | 4000                 |      |

214

215



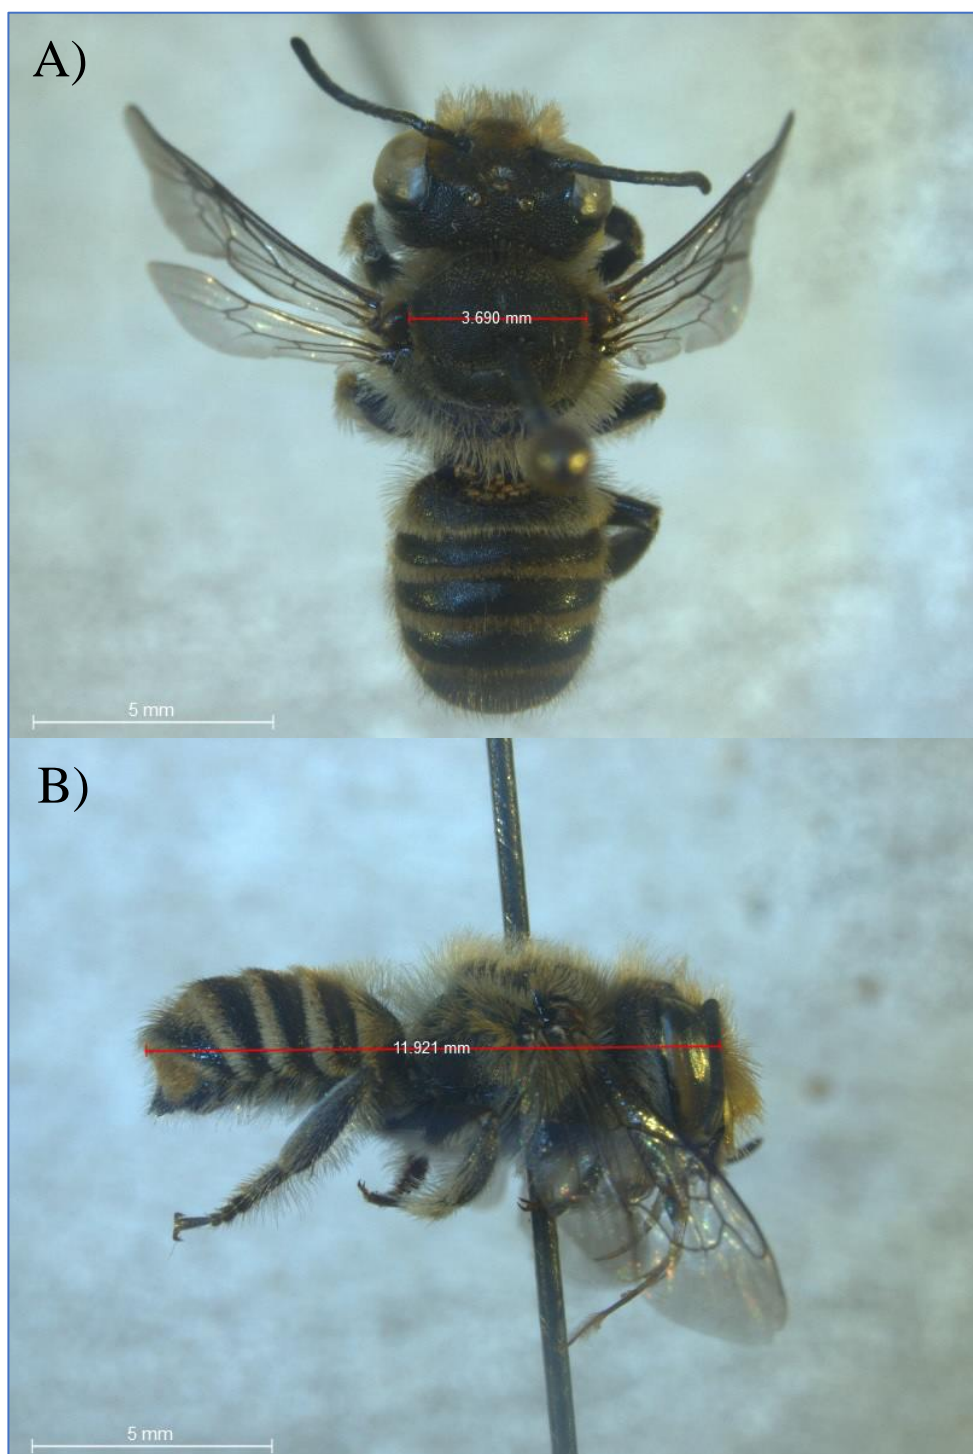

216

217 Figure S1. Photographs of A) intertegular distance (ITD) and B) body length (BL)

218 measurements. Specimen is an Australian ♂ *Megachile (Eutricharaea) serricauda*.

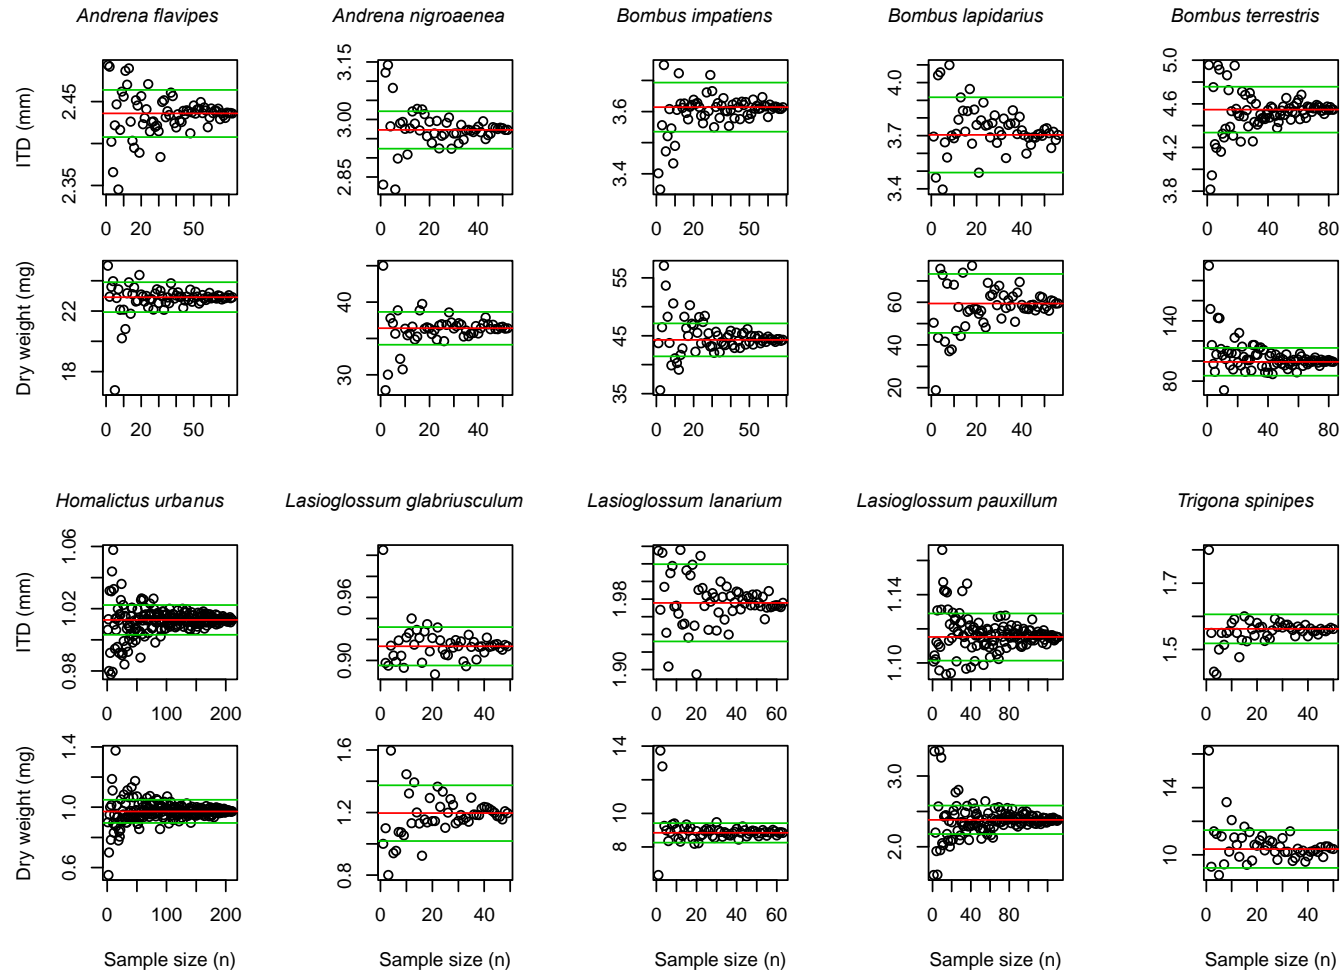

220

221 **Figure S2.** Intraspecific variation in intertegular distance (ITD) and body size (dry weight) in relation to sample size in the 10 most abundant bee

222 species. Red lines denote the total trait mean and green lines represent 95% confidence intervals.
